# Supplementary material
Source: PubMed Central journal article supplement (PMC3993900)
Supplement: ic500299s_si_002.pdf [file ic500299s_si_002.pdf]

# **Ruthenium tri(2-pyridylmethyl)amine is an effective photocaging group for nitriles.**

Rajgopal Sharma,<sup>1</sup> Jessical D. Knoll,<sup>4</sup> Philip D. Martin,<sup>1</sup> Izabela Podgorski,<sup>2,3</sup> Claudia  
Turro<sup>4</sup> and Jeremy J. Kodanko<sup>1,3\*</sup>

<sup>1</sup>Department of Chemistry, Wayne State University, 5101 Cass Ave, Detroit, MI 48202

<sup>2</sup>Department of Pharmacology, School of Medicine, Wayne State University, Detroit,  
Michigan 48201, <sup>3</sup>Barbara Ann Karmanos Cancer Institute, Detroit, Michigan 48201, and

<sup>4</sup>Department of Chemistry and Biochemistry, The Ohio State University, Columbus,  
Ohio 43210

Corresponding author: [jkodanko@chem.wayne.edu](mailto:jkodanko@chem.wayne.edu)

## **Supporting Information**

**(36 Pages)**

|                                                        |           |
|--------------------------------------------------------|-----------|
| <b>Part A.</b> General Considerations                  | <b>2</b>  |
| <b>Part B.</b> Experimental Procedures                 | <b>2</b>  |
| <b>Part C.</b> X-ray Crystallographic Analysis         | <b>7</b>  |
| <b>Part D.</b> Spectral Data for <b>1</b> and <b>2</b> | <b>23</b> |
| <b>Part E.</b> References                              | <b>36</b> |

## Part A. General Considerations

All reagents were purchased from commercial suppliers and used as received. NMR spectra were recorded on a Varian FT-NMR Mercury-400 MHz Spectrometer. Mass spectra were recorded on a Time-of-Flight Micromass LCT Premier XE Spectrometer. IR spectra were recorded on a Nicolet FT-IR spectrophotometer (KBr pellet). UV-vis spectra were recorded on a Varian Cary 50 spectrophotometer. The UV lamp used in all experiments was a long wavelength (UV-365 nm) Black Ray® Lamp. Lamp specifications are 8W, 115 V, 60 Hz and 0.16 amps. All reactions were performed under ambient atmosphere unless otherwise noted. Anaerobic reactions were performed by purging the reaction solutions with Ar or N<sub>2</sub>

## Part B. Experimental Procedures

**Synthesis of [Ru(TPA)(CH<sub>3</sub>CN)<sub>2</sub>](PF<sub>6</sub>)<sub>2</sub>.** [Ru(TPA)(DMSO)Cl]Cl<sup>1,2</sup> (200.0 mg, 0.370 mmol) as a 2:1 mixture of stereoisomers, was dissolved in a 1:1 mixture of H<sub>2</sub>O and CH<sub>3</sub>CN (20 mL) under argon atmosphere and the resulting solution was refluxed for 2 h under inert atmosphere. Ice cold water (20 mL) was added to the reaction mixture followed by a saturated solution of aqueous NH<sub>4</sub>PF<sub>6</sub> (5 mL), resulting in a pale yellow precipitate that was isolated by filtration, washed with ice-cold H<sub>2</sub>O and dried under reduced pressure to get the title complex as a yellow solid (136 mg, 48%). Crystals suitable for X-ray crystallographic analysis were obtained by diffusing Et<sub>2</sub>O into a solution of **1** in MeCN: mp = 190 °C (decomp); <sup>1</sup>H NMR (400MHz C<sub>3</sub>D<sub>6</sub>O:D<sub>2</sub>O - 9:1) δ 9.18 (d, 1H, *J* = 5.9 Hz), 8.83 (d, 2H, *J* = 5.9 Hz), 7.85 (t, 2H, *J* = 7.8 Hz), 7.68-7.56 (m,

3H), 7.41 (t, 2H,  $J = 6.8$  Hz), 7.25 (t, 1H,  $J = 6.8$  Hz), 7.18 (d, 1H,  $J = 7.8$  Hz), 5.25 (d, 2H,  $J = 15.6$  Hz), 5.15 (d, 2H,  $J = 15.6$  Hz), 4.86 (s, 2H), 2.88 (s, 3H), 2.47 (s, 3H); IR (KBr)  $\nu_{\max}$  ( $\text{cm}^{-1}$ ) 3666, 3592, 3418, 3119, 2935, 2856, 2276, 1729, 1609, 1481, 1461, 1448, 1311, 1289, 1160, 992, 838, 767, 739. ESMS calcd for  $\text{C}_{22}\text{H}_{24}\text{F}_6\text{N}_6\text{PRu}$  ( $\text{M}^{+1}$ ) 619.1, found 619.3; UV-vis  $\lambda_{\max} = 380$  ( $\epsilon = 11200 \text{ M}^{-1}\text{cm}^{-1}$ ); Anal. Calcd for  $\text{C}_{22}\text{H}_{24}\text{F}_{12}\text{N}_6\text{P}_2\text{Ru}$ : C, 34.61; H, 3.17; N, 11.01. Found: C, 34.70; H, 3.20; N, 10.82.

**Synthesis of  $[\text{Ru}(\text{TPA})(\text{RCN})_2](\text{PF}_6)_2$ .** A solution of  $[\text{Ru}(\text{TPA})(\text{H}_2\text{O})_2](\text{CF}_3\text{SO}_3)_2^3$  (540 mg, 0.72 mmol) and dry EtOH (40 mL) was deoxygenated by bubbling Ar through a submerged needle for 10 min. Cbz-Leu-NHCH<sub>2</sub>CN (1.09 g, 3.6 mmol) was added and the reaction mixture was refluxed for 24 h at 80 °C under Ar atmosphere. The reaction mixture was cooled to room temperature and concentrated under reduced pressure. The green oil was extracted with Et<sub>2</sub>O (3 × 20 mL) to get a dark green solid, which was dissolved in minimum amount of CH<sub>2</sub>Cl<sub>2</sub> and washed with water (3 × 30 mL). The organic layer was dried (NaSO<sub>4</sub>) and concentrated under reduced pressure to get a dark green solid (501 mg). The dark green solid was dissolved in MeOH (10 mL) and H<sub>2</sub>O (10 mL) was added. The insoluble green oil was removed by centrifugation. A saturated aqueous solution of NH<sub>4</sub>PF<sub>6</sub> (2 mL) was added to the clear pale green supernatant solution, resulting in formation of a precipitate that was isolated by filtration, washed with water (3 × 20 mL) and dried under reduced pressure to get the title compound as a pale yellow solid in analytically pure form (290 mg, 53%): mp = 210 °C (decomp); <sup>1</sup>H NMR (400MHz C<sub>3</sub>D<sub>6</sub>O)  $\delta$  9.19 (d, 1H,  $J = 5.6$  Hz), 8.85 (d, 1H,  $J = 6.1$  Hz), 8.84 (d, 1H,  $J = 6.1$  Hz), 8.50 (t, 1H,  $J = 5.1$  Hz), 8.16 (t, 1H,  $J = 4.7$  Hz), 7.92-

7.87 (m, 2H), 7.71-7.62 (m, 3H), 7.43-7.22 (m, 14H), 6.96 (d, 1H,  $J = 7.3$  Hz), 6.79 (d, 1H,  $J = 7.1$  Hz), 5.32 (d, 1H,  $J = 15.7$  Hz), 5.31 (d, 1H,  $J = 15.7$  Hz), 5.20-5.14 (m, 3H), 5.07-4.96 (m, 4H), 4.90-4.88 (m, 2H), 4.81 (d, 1H,  $J = 12.7$  Hz), 4.57-4.45 (m, 2H), 4.36-4.32 (m, 1H), 4.16-4.11 (m, 1H), 1.86-1.65 (m, 3H), 1.61-1.42 (m, 3H), 0.97-0.84 (m, 12H); IR (KBr)  $\nu_{\max}$  ( $\text{cm}^{-1}$ ) 3417, 3319, 2959, 2873, 2265, 1717, 1684, 1608, 1519, 1451, 1406, 1340, 1312, 1254, 1160, 1121, 1044, 844, 769, 740, 699; ESMS calcd for  $\text{C}_{50}\text{H}_{60}\text{F}_6\text{N}_{10}\text{O}_6\text{PRu}$  ( $\text{M}^{+1}$ ) 1143.3, found 1143.9; UV-vis  $\lambda_{\max} = 375$  ( $\epsilon = 12000 \text{ M}^{-1}\text{cm}^{-1}$ ); Anal. Calcd for  $\text{C}_{50}\text{H}_{61}\text{F}_{12}\text{N}_{10}\text{O}_{6.5}\text{P}_2\text{Ru}$  ( $2 \cdot 0.5 \text{ H}_2\text{O}$ ): C, 46.30; H, 4.74; N, 10.80. Found: C, 46.21; H, 4.79; N, 10.78.

**Photochemical Quantum Yields.** Photosubstitution quantum yields were determined using ferrioxalate actinometry as previously described in detail.<sup>4</sup> A 150 W Xe lamp housed in a Milliarc compact arc lamp housing (PTI) and powered by a PTI model LPS-220 power supply was used in the steady-state photolysis experiments; the wavelength of the light reaching the sample was controlled with colored glass long-pass (295 nm) and band-pass (350 nm) filters (Newport).

**Stability of 1 and 2 in Buffer.** Solutions of **1** or **2** in 0.1M pH 6.5 phosphate buffer (1.0% DMSO) were monitored by UV-Vis spectroscopy for 24 h. Ln A<sub>380</sub> was plotted vs. time and the line was fit to give a first order reaction rate constants.

**Table S1.** Observed rate constants for decomposition of **1** and **2** in 100% DMSO or pH 6.5 phosphate buffer (1.0% DMSO) at 298±2K.

| Compound and Condition             | <b>1</b> (DMSO)       | <b>1</b> (PBS)        | <b>2</b> (DMSO)       | <b>2</b> (PBS)          |
|------------------------------------|-----------------------|-----------------------|-----------------------|-------------------------|
| Rate constant k (s <sup>-1</sup> ) | 8(2)×10 <sup>-9</sup> | 6(2)×10 <sup>-9</sup> | 7(3)×10 <sup>-9</sup> | 1.2(2)×10 <sup>-8</sup> |
| t <sub>1/2</sub> (days)            | 1.07×10 <sup>3</sup>  | 1.33×10 <sup>3</sup>  | 1.25×10 <sup>3</sup>  | 7.35×10 <sup>3</sup>    |

**Cathepsin K inhibition studies.** Cathepsin enzyme activity was determined from kinetic measurements performed by fluorimetric detection of the hydrolysis product AMC at 37°C every 2 min for 14 min (8 measures). The excitation and emission wavelengths were 360 and 485 nm respectively. Excitation pulses were kept to a minimum to avoid photochemical ligand loss by **2**. The selective fluorescent substrate Z-Gly-Pro-Arg-AMC was used at a final concentration of 100 μM (obtained from Bachem, Torrance, CA). Enzyme activities are expressed as a percentage, with 100% equal to activity in the absence of inhibitor.

Recombinant cathepsin K (human) was obtained from Enzo Life Sciences (Farmingdale, NY). An 880 nM stock solution was prepared in 50 mM sodium acetate, pH 5.5, 50 mM NaCl, 0.5 mM EDTA and 5 mM DTT and kept at -80 °C. For each experiment the stock solution was diluted 110 times and activated for 15 min at 37°C

with a 400 mM sodium acetate, pH 5.5, 4 mM EDTA, 8 mM DTT assay buffer solution. The inhibitor was prepared as a 1% DMSO solution in the buffer solution (400 mM sodium acetate, pH 5.5, 4 mM EDTA, 0.01 % Triton X -100) and plated (Corning® 96 Well Flat Clear Bottom Black Polystyrene TC-Treated Microplates, 50 µL/well). Three experiments in triplicates (**2** or **3**, light or dark) were carried out on 96 well plates, with “dark” and “light” experiments on separate plates. The plate containing “dark” was carefully wrapped in aluminum foil and the other plate was exposed to 365 nm light (8W) for the same time period. The photolysis was conducted for 15 min (with gentle shaking of the plate every 2-3 min) using a long wavelength (UV-365 nm) Black Ray® Lamp (8W) held at distance of 18 cm from the plate. After photolysis, the reaction was initiated by addition of 50 µL of 200 µM Z-Gly-Pro-Arg-AMC solution in the assay buffer (final volume 100 µL, final enzyme concentration 2 nM). Cathepsin enzyme activity was determined from kinetic measurements performed by fluorimetric detection of the hydrolysis product AMC at 37°C every 2 min for 14 min (8 measures) and MAX RFU slope values used for plotting.

### Part C. X-ray Crystallographic Analysis.

A specimen of  $C_{49.50}H_{57}F_{24}N_{15.50}P_4Ru_2$  was used for the X-ray crystallographic analysis.

The X-ray intensity data were measured.

The total exposure time was 56.65 hours. The frames were integrated with the Bruker SAINT software package using a narrow-frame algorithm. The integration of the data using a triclinic unit cell yielded a total of 65934 reflections to a maximum  $\theta$  angle of  $26.37^\circ$  (0.80 Å resolution), of which 12628 were independent (average redundancy 5.221, completeness = 95.9%,  $R_{int} = 3.66\%$ ) and 10076 (79.79%) were greater than  $2\sigma(F^2)$ . The final cell constants of  $\underline{a} = 12.1129(8)$  Å,  $\underline{b} = 12.2928(8)$  Å,  $\underline{c} = 21.8490(15)$  Å,  $\alpha = 94.436(3)^\circ$ ,  $\beta = 97.000(3)^\circ$ ,  $\gamma = 91.324(3)^\circ$ , volume =  $3217.7(4)$  Å<sup>3</sup>, are based upon the refinement of the XYZ-centroids of 9922 reflections above  $20 \sigma(I)$  with  $4.669^\circ < 2\theta < 58.65^\circ$ . Data were corrected for absorption effects using the multi-scan method (SADABS). The ratio of minimum to maximum apparent transmission was 0.923.

The final anisotropic full-matrix least-squares refinement on  $F^2$  with 863 variables converged at  $R1 = 5.79\%$ , for the observed data and  $wR2 = 19.52\%$  for all data. The goodness-of-fit was 1.413. The largest peak in the final difference electron density synthesis was  $1.728 \text{ e}^-/\text{Å}^3$  and the largest hole was  $-1.368 \text{ e}^-/\text{Å}^3$  with an RMS deviation of  $0.130 \text{ e}^-/\text{Å}^3$ . On the basis of the final model, the calculated density was  $1.704 \text{ g/cm}^3$  and  $F(000)$ , 1653 e<sup>-</sup>.

**Table S2.** Crystal data and structure refinement for [Ru<sup>II</sup>(TPA)(CH<sub>3</sub>CN)<sub>2</sub>](PF<sub>6</sub>)<sub>2</sub>.

---

|                                     |                                                                                                      |                |
|-------------------------------------|------------------------------------------------------------------------------------------------------|----------------|
| Identification code                 | rs01147_rework                                                                                       |                |
| Chemical formula                    | C <sub>49.50</sub> H <sub>57</sub> F <sub>24</sub> N <sub>15.50</sub> P <sub>4</sub> Ru <sub>2</sub> |                |
| Formula weight                      | 1651.12                                                                                              |                |
| Temperature                         | 100(2) K                                                                                             |                |
| Wavelength                          | 0.71073 Å                                                                                            |                |
| Crystal system                      | triclinic                                                                                            |                |
| Space group                         | P -1                                                                                                 |                |
| Unit cell dimensions                | a = 12.1129(8) Å                                                                                     | α = 94.436(3)° |
|                                     | b = 12.2928(8) Å                                                                                     | β = 97.000(3)° |
|                                     | c = 21.8490(15) Å                                                                                    | γ = 91.324(3)° |
| Volume                              | 3217.7(4) Å <sup>3</sup>                                                                             |                |
| Z                                   | 2                                                                                                    |                |
| Density (calculated)                | 1.704 g/cm <sup>3</sup>                                                                              |                |
| Absorption coefficient              | 0.688 mm <sup>-1</sup>                                                                               |                |
| F(000)                              | 1653                                                                                                 |                |
| Theta range for data collection     | 0.94 to 26.37°                                                                                       |                |
| Index ranges                        | -15 ≤ h ≤ 15, -15 ≤ k ≤ 15, -26 ≤ l ≤ 27                                                             |                |
| Reflections collected               | 65934                                                                                                |                |
| Independent reflections             | 12628 [R(int) = 0.0366]                                                                              |                |
| Coverage of independent reflections | 95.9%                                                                                                |                |
| Absorption correction               | multi-scan                                                                                           |                |
| Refinement method                   | Full-matrix least-squares on F <sup>2</sup>                                                          |                |
| Refinement program                  | SHELXL-2013 (Sheldrick, 2013)                                                                        |                |
| Function minimized                  | Σ w(F <sub>o</sub> <sup>2</sup> - F <sub>c</sub> <sup>2</sup> ) <sup>2</sup>                         |                |
| Data / restraints / parameters      | 12628 / 0 / 863                                                                                      |                |
| Goodness-of-fit on F <sup>2</sup>   | 1.413                                                                                                |                |
| Δ/σ <sub>max</sub>                  | 0.001                                                                                                |                |
| Final R indices                     | 10076 data; I > 2σ(I) R1 = 0.0579, wR2 = 0.1853                                                      |                |
|                                     | all data R1 = 0.0771, wR2 = 0.1952                                                                   |                |
| Weighting scheme                    | w = 1/[σ <sup>2</sup> (F <sub>o</sub> <sup>2</sup> ) + (0.1000P) <sup>2</sup> + 0.5098P]             |                |
|                                     | where P = (F <sub>o</sub> <sup>2</sup> + 2F <sub>c</sub> <sup>2</sup> )/3                            |                |
| Largest diff. peak and hole         | 1.728 and -1.368 eÅ <sup>-3</sup>                                                                    |                |
| R.M.S. deviation from mean          | 0.130 eÅ <sup>-3</sup>                                                                               |                |



**Table S3.** Atomic coordinates and equivalent isotropic atomic displacement parameters ( $\text{\AA}^2$ )

U(eq) is defined as one third of the trace of the orthogonalized  $U_{ij}$  tensor.

|     | x/a         | y/b         | z/c         | U(eq)       |
|-----|-------------|-------------|-------------|-------------|
| Ru1 | 0.34193(3)  | 0.02767(3)  | 0.71876(2)  | 0.01620(14) |
| Ru2 | 0.12463(3)  | 0.48193(3)  | 0.22502(2)  | 0.01489(13) |
| P1  | 0.37972(15) | 0.73310(15) | 0.44715(8)  | 0.0404(4)   |
| P2  | 0.28898(12) | 0.70587(12) | 0.94526(7)  | 0.0277(4)   |
| P3  | 0.88862(12) | 0.78405(12) | 0.06745(7)  | 0.0257(3)   |
| P4  | 0.93103(12) | 0.79375(12) | 0.55563(7)  | 0.0264(3)   |
| F1  | 0.4210(4)   | 0.8474(4)   | 0.4811(2)   | 0.0693(14)  |
| F2  | 0.4994(4)   | 0.7224(4)   | 0.4218(3)   | 0.0834(17)  |
| F3  | 0.3461(5)   | 0.6162(4)   | 0.4136(3)   | 0.0880(18)  |
| F4  | 0.3476(6)   | 0.7906(4)   | 0.3881(3)   | 0.115(3)    |
| F5  | 0.4298(7)   | 0.6761(5)   | 0.5073(3)   | 0.120(3)    |
| F6  | 0.2729(5)   | 0.7372(6)   | 0.4762(4)   | 0.148(4)    |
| F7  | 0.3609(3)   | 0.7878(3)   | 0.99661(16) | 0.0380(9)   |
| F8  | 0.1842(3)   | 0.7210(3)   | 0.98206(18) | 0.0399(9)   |
| F9  | 0.2158(3)   | 0.6253(3)   | 0.89461(18) | 0.0459(10)  |
| F10 | 0.3934(3)   | 0.6912(3)   | 0.9086(2)   | 0.0549(11)  |
| F11 | 0.3242(3)   | 0.6056(3)   | 0.98446(19) | 0.0448(10)  |
| F12 | 0.2524(3)   | 0.8083(3)   | 0.90713(18) | 0.0468(10)  |
| F13 | 0.8923(4)   | 0.9144(3)   | 0.0769(2)   | 0.0526(11)  |
| F14 | 0.9894(3)   | 0.7860(4)   | 0.02752(19) | 0.0589(13)  |
| F15 | 0.9728(3)   | 0.7802(3)   | 0.12922(17) | 0.0486(10)  |
| F16 | 0.7868(3)   | 0.7824(3)   | 0.10735(17) | 0.0429(9)   |
| F17 | 0.8828(3)   | 0.6543(3)   | 0.05812(19) | 0.0463(10)  |
| F18 | 0.8035(3)   | 0.7885(3)   | 0.00615(16) | 0.0327(8)   |
| F19 | 0.0131(3)   | 0.6939(3)   | 0.5556(2)   | 0.0549(11)  |
| F20 | 0.0171(3)   | 0.8643(4)   | 0.52577(17) | 0.0530(11)  |
| F21 | 0.9894(3)   | 0.8369(3)   | 0.62285(16) | 0.0383(9)   |
| F22 | 0.8449(3)   | 0.7215(3)   | 0.58718(18) | 0.0445(9)   |

|     |           |           |             |            |
|-----|-----------|-----------|-------------|------------|
| F23 | 0.8496(3) | 0.8925(3) | 0.55660(19) | 0.0499(10) |
| F24 | 0.8735(3) | 0.7499(3) | 0.48833(16) | 0.0354(8)  |
| N1  | 0.3677(3) | 0.0445(3) | 0.8127(2)   | 0.0181(9)  |
| N2  | 0.4968(3) | 0.9698(3) | 0.7064(2)   | 0.0175(9)  |
| N3  | 0.3176(3) | 0.9989(4) | 0.6242(2)   | 0.0197(9)  |
| N4  | 0.1820(3) | 0.0846(3) | 0.7047(2)   | 0.0180(9)  |
| N5  | 0.2782(3) | 0.8705(3) | 0.7151(2)   | 0.0172(9)  |
| N6  | 0.4043(3) | 0.1828(4) | 0.7180(2)   | 0.0199(10) |
| N7  | 0.0664(3) | 0.3229(3) | 0.2107(2)   | 0.0171(9)  |
| N8  | 0.1535(4) | 0.4530(4) | 0.1348(2)   | 0.0215(10) |
| N9  | 0.1947(3) | 0.6320(3) | 0.2138(2)   | 0.0152(9)  |
| C57 | 0.2406(4) | 0.7078(5) | 0.2576(3)   | 0.0242(12) |
| N11 | 0.2788(3) | 0.4218(3) | 0.2439(2)   | 0.0171(9)  |
| N12 | 0.9689(3) | 0.5378(3) | 0.2050(2)   | 0.0197(9)  |
| N13 | 0.0982(3) | 0.5129(3) | 0.3146(2)   | 0.0185(9)  |
| N14 | 0.7548(6) | 0.5979(6) | 0.3667(4)   | 0.0591(18) |
| N15 | 0.5099(5) | 0.4123(6) | 0.8779(3)   | 0.0523(17) |
| N16 | 0.3473(5) | 0.0853(6) | 0.1038(3)   | 0.0565(18) |
| C1  | 0.3849(4) | 0.0464(4) | 0.8657(3)   | 0.0184(11) |
| C2  | 0.4082(5) | 0.0460(5) | 0.9327(3)   | 0.0284(13) |
| C3  | 0.5182(4) | 0.9722(4) | 0.6470(3)   | 0.0241(12) |
| C4  | 0.4302(4) | 0.0213(5) | 0.6038(3)   | 0.0260(12) |
| C5  | 0.2341(5) | 0.0768(5) | 0.6002(3)   | 0.0291(13) |
| C6  | 0.1449(4) | 0.0898(5) | 0.6437(3)   | 0.0233(12) |
| C7  | 0.1134(4) | 0.1090(4) | 0.7464(2)   | 0.0202(11) |
| C8  | 0.0048(4) | 0.1401(5) | 0.7293(3)   | 0.0245(12) |
| C9  | 0.9645(5) | 0.1411(4) | 0.6673(3)   | 0.0273(13) |
| C10 | 0.0393(5) | 0.1152(5) | 0.6237(3)   | 0.0298(13) |
| C11 | 0.2795(5) | 0.8834(5) | 0.6044(3)   | 0.0337(14) |
| C12 | 0.2610(4) | 0.8206(4) | 0.6585(3)   | 0.0211(12) |
| C13 | 0.2592(4) | 0.8185(4) | 0.7643(3)   | 0.0242(12) |
| C14 | 0.2195(4) | 0.7095(5) | 0.7570(3)   | 0.0289(13) |
| C15 | 0.2006(4) | 0.6559(5) | 0.6994(3)   | 0.0282(13) |
| C16 | 0.2232(4) | 0.7115(5) | 0.6488(3)   | 0.0280(13) |
| C17 | 0.6185(5) | 0.9368(5) | 0.6295(3)   | 0.0299(13) |
| C18 | 0.6991(5) | 0.9016(5) | 0.6724(3)   | 0.0297(14) |
| C19 | 0.6775(5) | 0.8995(4) | 0.7324(3)   | 0.0250(12) |
| C20 | 0.5748(4) | 0.9316(4) | 0.7483(3)   | 0.0212(11) |

|     |           |           |           |            |
|-----|-----------|-----------|-----------|------------|
| C21 | 0.4421(4) | 0.2689(4) | 0.7190(3) | 0.0221(12) |
| C22 | 0.4892(5) | 0.3799(5) | 0.7204(3) | 0.0290(13) |
| C23 | 0.0531(4) | 0.2511(4) | 0.2533(3) | 0.0183(11) |
| C24 | 0.0232(4) | 0.1414(4) | 0.2366(3) | 0.0222(12) |
| C25 | 0.0051(4) | 0.1065(4) | 0.1745(3) | 0.0246(12) |
| C26 | 0.0160(4) | 0.1805(4) | 0.1305(3) | 0.0244(12) |
| C27 | 0.0481(4) | 0.2893(4) | 0.1499(2) | 0.0203(11) |
| C28 | 0.0636(4) | 0.3730(4) | 0.1051(3) | 0.0235(12) |
| C29 | 0.1466(4) | 0.5599(4) | 0.1070(2) | 0.0233(12) |
| C30 | 0.2047(4) | 0.6462(4) | 0.1536(3) | 0.0211(11) |
| C31 | 0.2941(4) | 0.8008(4) | 0.2436(3) | 0.0220(12) |
| C32 | 0.3064(5) | 0.8149(5) | 0.1823(3) | 0.0298(13) |
| C33 | 0.2608(5) | 0.7364(4) | 0.1368(3) | 0.0262(13) |
| C34 | 0.2675(4) | 0.4052(5) | 0.1313(3) | 0.0254(13) |
| C35 | 0.3290(4) | 0.3898(4) | 0.1937(3) | 0.0175(11) |
| C36 | 0.3316(4) | 0.4090(4) | 0.3009(3) | 0.0226(12) |
| C37 | 0.4346(4) | 0.3636(4) | 0.3093(3) | 0.0289(14) |
| C38 | 0.4865(5) | 0.3319(4) | 0.2583(3) | 0.0301(14) |
| C39 | 0.4331(4) | 0.3445(4) | 0.1999(3) | 0.0288(14) |
| C40 | 0.8781(4) | 0.5651(5) | 0.2009(3) | 0.0251(12) |
| C41 | 0.7630(5) | 0.5956(5) | 0.1984(3) | 0.0395(17) |
| C42 | 0.0771(4) | 0.5367(4) | 0.3638(3) | 0.0217(12) |
| C43 | 0.0503(5) | 0.5689(6) | 0.4250(3) | 0.0357(15) |
| C44 | 0.6871(7) | 0.5614(7) | 0.4713(4) | 0.063(2)   |
| C45 | 0.7249(6) | 0.5799(6) | 0.4128(4) | 0.050(2)   |
| C46 | 0.4140(5) | 0.3682(5) | 0.9730(3) | 0.0404(16) |
| C47 | 0.4678(5) | 0.3930(5) | 0.9197(4) | 0.0400(16) |
| C48 | 0.1739(5) | 0.9740(5) | 0.0515(3) | 0.0364(15) |
| C49 | 0.2709(5) | 0.0371(5) | 0.0807(3) | 0.0335(14) |

---

**Table S4.** Bond lengths (Å).

---

|        |          |        |          |
|--------|----------|--------|----------|
| Ru1-N1 | 2.031(5) | Ru1-N6 | 2.037(5) |
| Ru1-N3 | 2.053(4) | Ru1-N5 | 2.056(4) |
| Ru1-N2 | 2.062(4) | Ru1-N4 | 2.071(4) |

|         |           |         |          |
|---------|-----------|---------|----------|
| Ru2-N13 | 2.030(5)  | Ru2-N12 | 2.031(4) |
| Ru2-N11 | 2.032(4)  | Ru2-N8  | 2.048(4) |
| Ru2-N7  | 2.051(4)  | Ru2-N9  | 2.057(4) |
| P1-F6   | 1.510(5)  | P1-F4   | 1.532(6) |
| P1-F1   | 1.579(4)  | P1-F3   | 1.583(5) |
| P1-F5   | 1.599(6)  | P1-F2   | 1.618(5) |
| P2-F10  | 1.583(4)  | P2-F8   | 1.590(4) |
| P2-F11  | 1.592(4)  | P2-F9   | 1.594(4) |
| P2-F12  | 1.604(4)  | P2-F7   | 1.605(4) |
| P3-F14  | 1.585(4)  | P3-F17  | 1.591(4) |
| P3-F18  | 1.593(4)  | P3-F15  | 1.594(4) |
| P3-F16  | 1.595(4)  | P3-F13  | 1.598(4) |
| P4-F20  | 1.574(4)  | P4-F23  | 1.582(4) |
| P4-F21  | 1.596(4)  | P4-F24  | 1.596(4) |
| P4-F19  | 1.597(4)  | P4-F22  | 1.606(4) |
| N1-C1   | 1.151(7)  | N2-C20  | 1.353(7) |
| N2-C3   | 1.357(7)  | N3-C5   | 1.487(7) |
| N3-C11  | 1.498(7)  | N3-C4   | 1.511(6) |
| N4-C7   | 1.327(7)  | N4-C6   | 1.360(7) |
| N5-C12  | 1.328(7)  | N5-C13  | 1.333(7) |
| N6-C21  | 1.141(7)  | N7-C23  | 1.351(7) |
| N7-C27  | 1.352(7)  | N8-C29  | 1.490(7) |
| N8-C28  | 1.501(7)  | N8-C34  | 1.521(7) |
| N9-C57  | 1.342(7)  | N9-C30  | 1.359(7) |
| C57-C31 | 1.375(8)  | C57-H57 | 0.95     |
| N11-C36 | 1.350(7)  | N11-C35 | 1.355(7) |
| N12-C40 | 1.152(7)  | N13-C42 | 1.152(7) |
| N14-C45 | 1.146(11) | N15-C47 | 1.137(9) |
| N16-C49 | 1.130(8)  | C1-C2   | 1.456(7) |
| C2-H1   | 0.98      | C2-H3   | 0.98     |
| C2-H2   | 0.98      | C3-C17  | 1.387(7) |
| C3-C4   | 1.503(8)  | C4-H17  | 0.99     |
| C4-H16  | 0.99      | C5-C6   | 1.526(7) |
| C5-H8   | 0.99      | C5-H9   | 0.99     |
| C6-C10  | 1.352(7)  | C7-C8   | 1.393(7) |
| C7-H7   | 0.95      | C8-C9   | 1.384(8) |
| C8-H4   | 0.95      | C9-C10  | 1.417(8) |
| C9-H5   | 0.95      | C10-H6  | 0.95     |

|         |          |         |           |
|---------|----------|---------|-----------|
| C11-C12 | 1.498(8) | C11-H14 | 0.99      |
| C11-H15 | 0.99     | C12-C16 | 1.398(8)  |
| C13-C14 | 1.404(8) | C13-H13 | 0.95      |
| C14-C15 | 1.365(8) | C14-H10 | 0.95      |
| C15-C16 | 1.396(9) | C15-H11 | 0.95      |
| C16-H12 | 0.95     | C17-C18 | 1.371(8)  |
| C17-H21 | 0.95     | C18-C19 | 1.370(8)  |
| C18-H20 | 0.95     | C19-C20 | 1.389(7)  |
| C19-H19 | 0.95     | C20-H18 | 0.95      |
| C21-C22 | 1.463(8) | C22-H24 | 0.98      |
| C22-H23 | 0.98     | C22-H22 | 0.98      |
| C23-C24 | 1.397(7) | C23-H25 | 0.95      |
| C24-C25 | 1.381(8) | C24-H26 | 0.95      |
| C25-C26 | 1.389(8) | C25-H42 | 0.95      |
| C26-C27 | 1.402(8) | C26-H41 | 0.95      |
| C27-C28 | 1.498(7) | C28-H39 | 0.99      |
| C28-H40 | 0.99     | C29-C30 | 1.511(8)  |
| C29-H27 | 0.99     | C29-H32 | 0.99      |
| C30-C33 | 1.383(8) | C31-C32 | 1.388(8)  |
| C31-H28 | 0.95     | C32-C33 | 1.385(8)  |
| C32-H30 | 0.95     | C33-H29 | 0.95      |
| C34-C35 | 1.500(8) | C34-H37 | 0.99      |
| C34-H38 | 0.99     | C35-C39 | 1.386(7)  |
| C36-C37 | 1.377(7) | C36-H36 | 0.95      |
| C37-C38 | 1.379(9) | C37-H33 | 0.95      |
| C38-C39 | 1.380(9) | C38-H35 | 0.95      |
| C39-H34 | 0.95     | C40-C41 | 1.448(7)  |
| C41-H43 | 0.98     | C41-H44 | 0.98      |
| C41-H45 | 0.98     | C42-C43 | 1.442(8)  |
| C43-H47 | 0.98     | C43-H46 | 0.98      |
| C43-H48 | 0.98     | C44-C45 | 1.442(13) |
| C44-H49 | 0.98     | C44-H51 | 0.98      |
| C44-H50 | 0.98     | C46-C47 | 1.450(10) |
| C46-H52 | 0.98     | C46-H53 | 0.98      |
| C46-H54 | 0.98     | C48-C49 | 1.446(9)  |
| C48-H58 | 0.98     | C48-H55 | 0.98      |
| C48-H56 | 0.98     |         |           |

**Table S5.** Bond angles (°)

---

|             |            |             |            |
|-------------|------------|-------------|------------|
| N1-Ru1-N6   | 88.80(17)  | N1-Ru1-N3   | 175.88(16) |
| N6-Ru1-N3   | 94.79(17)  | N1-Ru1-N5   | 93.86(17)  |
| N6-Ru1-N5   | 177.34(17) | N3-Ru1-N5   | 82.55(17)  |
| N1-Ru1-N2   | 96.35(16)  | N6-Ru1-N2   | 89.14(16)  |
| N3-Ru1-N2   | 81.70(17)  | N5-Ru1-N2   | 90.43(16)  |
| N1-Ru1-N4   | 99.50(16)  | N6-Ru1-N4   | 89.73(16)  |
| N3-Ru1-N4   | 82.57(17)  | N5-Ru1-N4   | 89.96(15)  |
| N2-Ru1-N4   | 164.09(18) | N13-Ru2-N12 | 84.79(17)  |
| N13-Ru2-N11 | 95.87(17)  | N12-Ru2-N11 | 178.38(17) |
| N13-Ru2-N8  | 178.94(17) | N12-Ru2-N8  | 95.59(17)  |
| N11-Ru2-N8  | 83.77(18)  | N13-Ru2-N7  | 99.34(17)  |
| N12-Ru2-N7  | 91.47(16)  | N11-Ru2-N7  | 86.96(16)  |
| N8-Ru2-N7   | 81.64(17)  | N13-Ru2-N9  | 97.26(17)  |
| N12-Ru2-N9  | 91.30(16)  | N11-Ru2-N9  | 90.08(15)  |
| N8-Ru2-N9   | 81.75(17)  | N7-Ru2-N9   | 163.35(17) |
| F6-P1-F4    | 101.5(5)   | F6-P1-F1    | 91.4(3)    |
| F4-P1-F1    | 88.6(3)    | F6-P1-F3    | 91.5(3)    |
| F4-P1-F3    | 92.8(3)    | F1-P1-F3    | 176.4(3)   |
| F6-P1-F5    | 85.7(5)    | F4-P1-F5    | 172.5(4)   |
| F1-P1-F5    | 89.0(3)    | F3-P1-F5    | 89.2(3)    |
| F6-P1-F2    | 174.3(5)   | F4-P1-F2    | 84.2(4)    |
| F1-P1-F2    | 88.8(3)    | F3-P1-F2    | 88.1(3)    |
| F5-P1-F2    | 88.6(4)    | F10-P2-F8   | 179.8(2)   |
| F10-P2-F11  | 90.9(2)    | F8-P2-F11   | 89.2(2)    |
| F10-P2-F9   | 90.5(2)    | F8-P2-F9    | 89.5(2)    |
| F11-P2-F9   | 90.2(2)    | F10-P2-F12  | 90.2(2)    |
| F8-P2-F12   | 89.7(2)    | F11-P2-F12  | 178.7(2)   |
| F9-P2-F12   | 90.5(2)    | F10-P2-F7   | 90.3(2)    |
| F8-P2-F7    | 89.6(2)    | F11-P2-F7   | 90.1(2)    |
| F9-P2-F7    | 179.1(2)   | F12-P2-F7   | 89.2(2)    |
| F14-P3-F17  | 89.7(2)    | F14-P3-F18  | 89.9(2)    |
| F17-P3-F18  | 89.6(2)    | F14-P3-F15  | 90.7(2)    |
| F17-P3-F15  | 90.7(2)    | F18-P3-F15  | 179.4(2)   |
| F14-P3-F16  | 179.7(3)   | F17-P3-F16  | 90.5(2)    |
| F18-P3-F16  | 89.9(2)    | F15-P3-F16  | 89.6(2)    |
| F14-P3-F13  | 91.1(3)    | F17-P3-F13  | 179.1(2)   |

|             |          |             |          |
|-------------|----------|-------------|----------|
| F18-P3-F13  | 90.0(2)  | F15-P3-F13  | 89.7(2)  |
| F16-P3-F13  | 88.7(2)  | F20-P4-F23  | 90.5(2)  |
| F20-P4-F21  | 89.8(2)  | F23-P4-F21  | 89.8(2)  |
| F20-P4-F24  | 90.1(2)  | F23-P4-F24  | 90.6(2)  |
| F21-P4-F24  | 179.5(2) | F20-P4-F19  | 90.0(3)  |
| F23-P4-F19  | 179.2(2) | F21-P4-F19  | 89.6(2)  |
| F24-P4-F19  | 90.0(2)  | F20-P4-F22  | 178.9(2) |
| F23-P4-F22  | 90.1(2)  | F21-P4-F22  | 89.3(2)  |
| F24-P4-F22  | 90.8(2)  | F19-P4-F22  | 89.5(2)  |
| C1-N1-Ru1   | 175.1(4) | C20-N2-C3   | 118.8(4) |
| C20-N2-Ru1  | 129.1(4) | C3-N2-Ru1   | 112.1(3) |
| C5-N3-C11   | 111.0(4) | C5-N3-C4    | 111.8(4) |
| C11-N3-C4   | 109.9(4) | C5-N3-Ru1   | 107.2(3) |
| C11-N3-Ru1  | 111.9(3) | C4-N3-Ru1   | 104.8(3) |
| C7-N4-C6    | 119.0(4) | C7-N4-Ru1   | 128.4(4) |
| C6-N4-Ru1   | 112.4(3) | C12-N5-C13  | 121.1(5) |
| C12-N5-Ru1  | 114.2(3) | C13-N5-Ru1  | 124.7(4) |
| C21-N6-Ru1  | 177.7(4) | C23-N7-C27  | 119.6(4) |
| C23-N7-Ru2  | 128.4(4) | C27-N7-Ru2  | 111.8(3) |
| C29-N8-C28  | 112.1(4) | C29-N8-C34  | 110.7(4) |
| C28-N8-C34  | 110.3(4) | C29-N8-Ru2  | 106.8(3) |
| C28-N8-Ru2  | 106.0(3) | C34-N8-Ru2  | 110.7(3) |
| C57-N9-C30  | 118.7(5) | C57-N9-Ru2  | 128.4(4) |
| C30-N9-Ru2  | 112.5(3) | N9-C57-C31  | 122.3(5) |
| N9-C57-H57  | 118.8    | C31-C57-H57 | 118.8    |
| C36-N11-C35 | 119.1(4) | C36-N11-Ru2 | 125.8(4) |
| C35-N11-Ru2 | 115.1(3) | C40-N12-Ru2 | 171.3(4) |
| C42-N13-Ru2 | 174.4(4) | N1-C1-C2    | 178.4(6) |
| C1-C2-H1    | 109.5    | C1-C2-H3    | 109.5    |
| H1-C2-H3    | 109.5    | C1-C2-H2    | 109.5    |
| H1-C2-H2    | 109.5    | H3-C2-H2    | 109.5    |
| N2-C3-C17   | 120.7(5) | N2-C3-C4    | 115.7(5) |
| C17-C3-C4   | 123.4(5) | C3-C4-N3    | 109.0(4) |
| C3-C4-H17   | 109.9    | N3-C4-H17   | 109.9    |
| C3-C4-H16   | 109.9    | N3-C4-H16   | 109.9    |
| H17-C4-H16  | 108.3    | N3-C5-C6    | 109.6(4) |
| N3-C5-H8    | 109.8    | C6-C5-H8    | 109.8    |
| N3-C5-H9    | 109.8    | C6-C5-H9    | 109.8    |

|             |          |             |          |
|-------------|----------|-------------|----------|
| H8-C5-H9    | 108.2    | C10-C6-N4   | 122.4(5) |
| C10-C6-C5   | 122.2(5) | N4-C6-C5    | 115.1(4) |
| N4-C7-C8    | 121.8(5) | N4-C7-H7    | 119.1    |
| C8-C7-H7    | 119.1    | C9-C8-C7    | 119.8(5) |
| C9-C8-H4    | 120.1    | C7-C8-H4    | 120.1    |
| C8-C9-C10   | 117.4(5) | C8-C9-H5    | 121.3    |
| C10-C9-H5   | 121.3    | C6-C10-C9   | 119.5(5) |
| C6-C10-H6   | 120.2    | C9-C10-H6   | 120.2    |
| N3-C11-C12  | 111.7(5) | N3-C11-H14  | 109.3    |
| C12-C11-H14 | 109.3    | N3-C11-H15  | 109.3    |
| C12-C11-H15 | 109.3    | H14-C11-H15 | 107.9    |
| N5-C12-C16  | 121.0(5) | N5-C12-C11  | 119.2(5) |
| C16-C12-C11 | 119.8(5) | N5-C13-C14  | 120.2(6) |
| N5-C13-H13  | 119.9    | C14-C13-H13 | 119.9    |
| C15-C14-C13 | 120.2(5) | C15-C14-H10 | 119.9    |
| C13-C14-H10 | 119.9    | C14-C15-C16 | 118.5(5) |
| C14-C15-H11 | 120.8    | C16-C15-H11 | 120.8    |
| C15-C16-C12 | 119.1(6) | C15-C16-H12 | 120.5    |
| C12-C16-H12 | 120.5    | C18-C17-C3  | 120.5(6) |
| C18-C17-H21 | 119.8    | C3-C17-H21  | 119.8    |
| C19-C18-C17 | 118.7(5) | C19-C18-H20 | 120.6    |
| C17-C18-H20 | 120.6    | C18-C19-C20 | 119.7(5) |
| C18-C19-H19 | 120.2    | C20-C19-H19 | 120.2    |
| N2-C20-C19  | 121.5(5) | N2-C20-H18  | 119.3    |
| C19-C20-H18 | 119.3    | N6-C21-C22  | 179.2(6) |
| C21-C22-H24 | 109.5    | C21-C22-H23 | 109.5    |
| H24-C22-H23 | 109.5    | C21-C22-H22 | 109.5    |
| H24-C22-H22 | 109.5    | H23-C22-H22 | 109.5    |
| N7-C23-C24  | 122.1(5) | N7-C23-H25  | 118.9    |
| C24-C23-H25 | 118.9    | C25-C24-C23 | 118.4(5) |
| C25-C24-H26 | 120.8    | C23-C24-H26 | 120.8    |
| C24-C25-C26 | 119.7(5) | C24-C25-H42 | 120.1    |
| C26-C25-H42 | 120.1    | C25-C26-C27 | 119.4(5) |
| C25-C26-H41 | 120.3    | C27-C26-H41 | 120.3    |
| N7-C27-C26  | 120.6(5) | N7-C27-C28  | 117.0(5) |
| C26-C27-C28 | 122.4(5) | C27-C28-N8  | 107.9(4) |
| C27-C28-H39 | 110.1    | N8-C28-H39  | 110.1    |
| C27-C28-H40 | 110.1    | N8-C28-H40  | 110.1    |



|             |          |             |           |
|-------------|----------|-------------|-----------|
| H39-C28-H40 | 108.4    | N8-C29-C30  | 108.2(4)  |
| N8-C29-H27  | 110.1    | C30-C29-H27 | 110.1     |
| N8-C29-H32  | 110.1    | C30-C29-H32 | 110.1     |
| H27-C29-H32 | 108.4    | N9-C30-C33  | 121.6(5)  |
| N9-C30-C29  | 115.5(5) | C33-C30-C29 | 122.9(5)  |
| C57-C31-C32 | 119.2(5) | C57-C31-H28 | 120.4     |
| C32-C31-H28 | 120.4    | C33-C32-C31 | 118.8(5)  |
| C33-C32-H30 | 120.6    | C31-C32-H30 | 120.6     |
| C30-C33-C32 | 119.3(5) | C30-C33-H29 | 120.4     |
| C32-C33-H29 | 120.4    | C35-C34-N8  | 112.9(4)  |
| C35-C34-H37 | 109.0    | N8-C34-H37  | 109.0     |
| C35-C34-H38 | 109.0    | N8-C34-H38  | 109.0     |
| H37-C34-H38 | 107.8    | N11-C35-C39 | 121.1(5)  |
| N11-C35-C34 | 117.4(4) | C39-C35-C34 | 121.4(5)  |
| N11-C36-C37 | 121.8(5) | N11-C36-H36 | 119.1     |
| C37-C36-H36 | 119.1    | C36-C37-C38 | 119.3(6)  |
| C36-C37-H33 | 120.4    | C38-C37-H33 | 120.4     |
| C37-C38-C39 | 119.3(5) | C37-C38-H35 | 120.3     |
| C39-C38-H35 | 120.3    | C38-C39-C35 | 119.3(5)  |
| C38-C39-H34 | 120.3    | C35-C39-H34 | 120.3     |
| N12-C40-C41 | 176.8(6) | C40-C41-H43 | 109.5     |
| C40-C41-H44 | 109.5    | H43-C41-H44 | 109.5     |
| C40-C41-H45 | 109.5    | H43-C41-H45 | 109.5     |
| H44-C41-H45 | 109.5    | N13-C42-C43 | 178.7(6)  |
| C42-C43-H47 | 109.5    | C42-C43-H46 | 109.5     |
| H47-C43-H46 | 109.5    | C42-C43-H48 | 109.5     |
| H47-C43-H48 | 109.5    | H46-C43-H48 | 109.5     |
| C45-C44-H49 | 109.5    | C45-C44-H51 | 109.5     |
| H49-C44-H51 | 109.5    | C45-C44-H50 | 109.5     |
| H49-C44-H50 | 109.5    | H51-C44-H50 | 109.5     |
| N14-C45-C44 | 178.0(9) | C47-C46-H52 | 109.5     |
| C47-C46-H53 | 109.5    | H52-C46-H53 | 109.5     |
| C47-C46-H54 | 109.5    | H52-C46-H54 | 109.5     |
| H53-C46-H54 | 109.5    | N15-C47-C46 | 179.9(10) |
| C49-C48-H58 | 109.5    | C49-C48-H55 | 109.5     |
| H58-C48-H55 | 109.5    | C49-C48-H56 | 109.5     |
| H58-C48-H56 | 109.5    | H55-C48-H56 | 109.5     |
| N16-C49-C48 | 179.1(7) |             |           |

**Table S6.** Anisotropic displacement parameters ( $\text{\AA}^2$ ).

The anisotropic atomic displacement factor exponent takes the form:  $-2\pi^2 [ h^2 a^{*2} U_{11} + \dots + 2 h k a^* b^* U_{12} ]$

|     | U11        | U22        | U33        | U23          | U13         | U12         |
|-----|------------|------------|------------|--------------|-------------|-------------|
| Ru1 | 0.0147(2)  | 0.0168(2)  | 0.0175(3)  | 0.00155(18)  | 0.00313(15) | 0.00220(16) |
| Ru2 | 0.0125(2)  | 0.0153(2)  | 0.0171(2)  | -0.00021(17) | 0.00365(15) | 0.00086(16) |
| P1  | 0.0521(11) | 0.0404(10) | 0.0282(10) | -0.0096(8)   | 0.0145(8)   | -0.0165(8)  |
| P2  | 0.0273(8)  | 0.0273(8)  | 0.0293(9)  | 0.0024(7)    | 0.0063(6)   | 0.0020(6)   |
| P3  | 0.0241(8)  | 0.0286(8)  | 0.0239(8)  | -0.0033(7)   | 0.0036(6)   | 0.0044(6)   |
| P4  | 0.0287(8)  | 0.0282(8)  | 0.0229(8)  | 0.0020(7)    | 0.0056(6)   | 0.0038(6)   |
| F1  | 0.099(4)   | 0.059(3)   | 0.050(3)   | -0.023(2)    | 0.037(3)    | -0.035(3)   |
| F2  | 0.076(3)   | 0.059(3)   | 0.126(5)   | 0.012(3)     | 0.051(3)    | 0.010(3)    |
| F3  | 0.150(5)   | 0.043(3)   | 0.075(4)   | -0.026(3)    | 0.054(3)    | -0.034(3)   |
| F4  | 0.214(7)   | 0.061(3)   | 0.054(4)   | 0.003(3)     | -0.046(4)   | -0.007(4)   |
| F5  | 0.199(7)   | 0.086(4)   | 0.071(4)   | 0.032(4)     | -0.001(4)   | -0.046(5)   |
| F6  | 0.087(4)   | 0.148(6)   | 0.209(9)   | -0.104(6)    | 0.102(5)    | -0.070(4)   |
| F7  | 0.033(2)   | 0.046(2)   | 0.033(2)   | 0.0027(17)   | -0.0022(15) | -0.0098(16) |
| F8  | 0.0267(19) | 0.046(2)   | 0.049(2)   | 0.0016(19)   | 0.0120(16)  | -0.0003(16) |
| F9  | 0.055(2)   | 0.045(2)   | 0.036(2)   | -0.0081(18)  | 0.0052(17)  | -0.0148(18) |
| F10 | 0.035(2)   | 0.065(3)   | 0.069(3)   | -0.004(2)    | 0.028(2)    | -0.0010(19) |
| F11 | 0.043(2)   | 0.029(2)   | 0.062(3)   | 0.0117(19)   | -0.0014(18) | 0.0074(16)  |
| F12 | 0.063(3)   | 0.034(2)   | 0.043(3)   | 0.0136(19)   | -0.0018(19) | 0.0001(18)  |
| F13 | 0.073(3)   | 0.030(2)   | 0.048(3)   | -0.0107(19)  | -0.007(2)   | -0.0065(19) |
| F14 | 0.029(2)   | 0.099(3)   | 0.045(3)   | -0.028(2)    | 0.0174(17)  | -0.023(2)   |
| F15 | 0.042(2)   | 0.068(3)   | 0.032(2)   | -0.007(2)    | -0.0090(16) | 0.0236(19)  |
| F16 | 0.036(2)   | 0.056(2)   | 0.039(2)   | 0.0004(19)   | 0.0152(16)  | 0.0021(17)  |
| F17 | 0.054(2)   | 0.0281(19) | 0.056(3)   | 0.0042(19)   | -0.0013(19) | 0.0150(17)  |
| F18 | 0.041(2)   | 0.0268(18) | 0.028(2)   | -0.0003(15)  | -0.0015(14) | -0.0050(15) |
| F19 | 0.052(2)   | 0.057(3)   | 0.051(3)   | -0.011(2)    | -0.0071(19) | 0.028(2)    |
| F20 | 0.054(2)   | 0.079(3)   | 0.025(2)   | 0.006(2)     | 0.0051(17)  | -0.022(2)   |
| F21 | 0.054(2)   | 0.037(2)   | 0.023(2)   | -0.0015(16)  | 0.0051(16)  | -0.0046(17) |
| F22 | 0.049(2)   | 0.047(2)   | 0.038(2)   | 0.0033(18)   | 0.0114(17)  | -0.0122(18) |
| F23 | 0.064(3)   | 0.041(2)   | 0.047(3)   | 0.0077(19)   | 0.0077(19)  | 0.0254(19)  |
| F24 | 0.0323(19) | 0.043(2)   | 0.032(2)   | 0.0049(17)   | 0.0033(14)  | 0.0038(15)  |

|     |            |          |          |             |            |             |
|-----|------------|----------|----------|-------------|------------|-------------|
| N1  | 0.010(2)   | 0.017(2) | 0.027(3) | -0.001(2)   | 0.0022(17) | 0.0018(17)  |
| N2  | 0.015(2)   | 0.014(2) | 0.024(3) | 0.0007(19)  | 0.0070(17) | 0.0009(17)  |
| N3  | 0.019(2)   | 0.021(2) | 0.020(2) | 0.004(2)    | 0.0058(17) | 0.0017(18)  |
| N4  | 0.018(2)   | 0.013(2) | 0.023(3) | 0.0029(19)  | 0.0027(17) | 0.0010(17)  |
| N5  | 0.0050(19) | 0.019(2) | 0.028(3) | 0.002(2)    | 0.0018(16) | 0.0027(16)  |
| N6  | 0.017(2)   | 0.022(3) | 0.021(3) | 0.002(2)    | 0.0059(17) | 0.0027(19)  |
| N7  | 0.013(2)   | 0.017(2) | 0.021(3) | -0.0020(19) | 0.0028(16) | -0.0004(17) |
| N8  | 0.029(3)   | 0.019(2) | 0.017(2) | 0.0022(19)  | 0.0024(18) | 0.0007(19)  |
| N9  | 0.013(2)   | 0.012(2) | 0.021(2) | -0.0004(18) | 0.0028(16) | 0.0036(16)  |
| C57 | 0.021(3)   | 0.031(3) | 0.020(3) | -0.001(3)   | 0.000(2)   | 0.007(2)    |
| N11 | 0.014(2)   | 0.010(2) | 0.027(3) | 0.0013(19)  | 0.0048(17) | 0.0006(16)  |
| N12 | 0.020(2)   | 0.020(2) | 0.020(3) | 0.0003(19)  | 0.0041(17) | 0.0003(18)  |
| N13 | 0.016(2)   | 0.016(2) | 0.024(3) | 0.0009(19)  | 0.0022(18) | -0.0012(17) |
| N14 | 0.058(4)   | 0.053(4) | 0.062(5) | -0.008(4)   | -0.004(3)  | 0.015(3)    |
| N15 | 0.027(3)   | 0.069(5) | 0.062(5) | 0.012(4)    | 0.000(3)   | 0.014(3)    |
| N16 | 0.060(4)   | 0.070(5) | 0.036(4) | 0.019(3)    | -0.015(3)  | -0.012(3)   |
| C1  | 0.011(2)   | 0.020(3) | 0.024(3) | 0.001(2)    | 0.002(2)   | 0.003(2)    |
| C2  | 0.035(3)   | 0.032(3) | 0.017(3) | 0.003(3)    | 0.000(2)   | 0.005(3)    |
| C3  | 0.026(3)   | 0.020(3) | 0.027(3) | 0.002(2)    | 0.006(2)   | 0.001(2)    |
| C4  | 0.019(3)   | 0.037(3) | 0.024(3) | 0.002(3)    | 0.010(2)   | 0.002(2)    |
| C5  | 0.026(3)   | 0.042(4) | 0.020(3) | 0.007(3)    | 0.004(2)   | 0.010(3)    |
| C6  | 0.020(3)   | 0.028(3) | 0.022(3) | 0.006(2)    | 0.001(2)   | 0.006(2)    |
| C7  | 0.022(3)   | 0.020(3) | 0.018(3) | 0.002(2)    | 0.002(2)   | -0.004(2)   |
| C8  | 0.023(3)   | 0.026(3) | 0.026(3) | 0.000(3)    | 0.006(2)   | 0.006(2)    |
| C9  | 0.020(3)   | 0.023(3) | 0.040(4) | 0.008(3)    | 0.003(2)   | 0.007(2)    |
| C10 | 0.028(3)   | 0.041(4) | 0.021(3) | 0.008(3)    | -0.003(2)  | 0.002(3)    |
| C11 | 0.044(4)   | 0.035(3) | 0.023(3) | 0.001(3)    | 0.005(3)   | -0.010(3)   |
| C12 | 0.010(2)   | 0.025(3) | 0.027(3) | 0.001(3)    | 0.003(2)   | 0.002(2)    |
| C13 | 0.018(3)   | 0.022(3) | 0.033(3) | 0.005(3)    | 0.003(2)   | 0.008(2)    |
| C14 | 0.024(3)   | 0.030(3) | 0.035(4) | 0.013(3)    | 0.010(2)   | 0.003(2)    |
| C15 | 0.021(3)   | 0.018(3) | 0.045(4) | 0.001(3)    | 0.004(2)   | 0.000(2)    |
| C16 | 0.024(3)   | 0.025(3) | 0.033(4) | -0.005(3)   | 0.000(2)   | -0.001(2)   |
| C17 | 0.025(3)   | 0.034(3) | 0.033(4) | 0.001(3)    | 0.014(2)   | 0.008(3)    |
| C18 | 0.023(3)   | 0.028(3) | 0.039(4) | -0.007(3)   | 0.014(2)   | 0.004(2)    |
| C19 | 0.023(3)   | 0.017(3) | 0.035(4) | 0.005(2)    | 0.005(2)   | 0.002(2)    |
| C20 | 0.016(3)   | 0.019(3) | 0.028(3) | 0.001(2)    | 0.002(2)   | 0.000(2)    |
| C21 | 0.015(3)   | 0.020(3) | 0.032(3) | 0.002(2)    | 0.004(2)   | 0.005(2)    |
| C22 | 0.025(3)   | 0.022(3) | 0.040(4) | 0.002(3)    | 0.006(2)   | -0.002(2)   |

|     |          |          |          |           |            |             |
|-----|----------|----------|----------|-----------|------------|-------------|
| C23 | 0.016(3) | 0.016(3) | 0.024(3) | 0.002(2)  | 0.005(2)   | 0.002(2)    |
| C24 | 0.022(3) | 0.020(3) | 0.025(3) | 0.001(2)  | 0.005(2)   | -0.001(2)   |
| C25 | 0.025(3) | 0.017(3) | 0.031(3) | -0.006(3) | 0.005(2)   | 0.000(2)    |
| C26 | 0.026(3) | 0.024(3) | 0.022(3) | -0.002(2) | 0.001(2)   | 0.000(2)    |
| C27 | 0.015(3) | 0.027(3) | 0.018(3) | 0.001(2)  | 0.0034(19) | 0.002(2)    |
| C28 | 0.024(3) | 0.023(3) | 0.023(3) | -0.003(2) | 0.004(2)   | -0.003(2)   |
| C29 | 0.029(3) | 0.024(3) | 0.017(3) | 0.004(2)  | 0.003(2)   | 0.001(2)    |
| C30 | 0.019(3) | 0.019(3) | 0.026(3) | 0.002(2)  | 0.006(2)   | 0.006(2)    |
| C31 | 0.024(3) | 0.014(3) | 0.027(3) | 0.000(2)  | 0.000(2)   | 0.000(2)    |
| C32 | 0.033(3) | 0.026(3) | 0.029(4) | -0.004(3) | 0.005(2)   | -0.003(2)   |
| C33 | 0.034(3) | 0.021(3) | 0.026(3) | 0.011(3)  | 0.010(2)   | -0.001(2)   |
| C34 | 0.018(3) | 0.032(3) | 0.028(3) | -0.003(3) | 0.012(2)   | -0.001(2)   |
| C35 | 0.016(3) | 0.006(2) | 0.033(3) | 0.003(2)  | 0.008(2)   | -0.0014(19) |
| C36 | 0.021(3) | 0.015(3) | 0.031(3) | 0.002(2)  | 0.000(2)   | 0.000(2)    |
| C37 | 0.020(3) | 0.018(3) | 0.047(4) | 0.007(3)  | -0.002(3)  | -0.003(2)   |
| C38 | 0.018(3) | 0.010(3) | 0.063(5) | 0.005(3)  | 0.004(3)   | 0.004(2)    |
| C39 | 0.022(3) | 0.017(3) | 0.050(4) | 0.000(3)  | 0.016(3)   | -0.001(2)   |
| C40 | 0.022(3) | 0.027(3) | 0.028(3) | 0.008(3)  | 0.005(2)   | 0.007(2)    |
| C41 | 0.015(3) | 0.044(4) | 0.062(5) | 0.023(4)  | 0.004(3)   | 0.008(3)    |
| C42 | 0.012(3) | 0.024(3) | 0.029(3) | 0.000(3)  | 0.005(2)   | -0.001(2)   |
| C43 | 0.035(3) | 0.048(4) | 0.025(4) | -0.006(3) | 0.011(3)   | -0.003(3)   |
| C44 | 0.055(5) | 0.050(5) | 0.081(7) | 0.016(5)  | -0.007(4)  | -0.010(4)   |
| C45 | 0.037(4) | 0.041(4) | 0.066(6) | -0.001(4) | -0.016(4)  | 0.002(3)    |
| C46 | 0.020(3) | 0.038(4) | 0.062(5) | -0.001(3) | 0.002(3)   | -0.003(3)   |
| C47 | 0.029(4) | 0.035(4) | 0.052(5) | -0.003(3) | -0.005(3)  | 0.005(3)    |
| C48 | 0.034(3) | 0.029(3) | 0.046(4) | 0.003(3)  | 0.004(3)   | 0.005(3)    |
| C49 | 0.036(4) | 0.031(3) | 0.035(4) | 0.015(3)  | 0.001(3)   | 0.003(3)    |

**Table S7.** Hydrogen coordinates (x) and isotropic atomic displacement parameters ( $\text{\AA}^2$ ).

|     | x      | y       | z      | U(eq) |
|-----|--------|---------|--------|-------|
| H57 | 0.2359 | 0.6968  | 0.2998 | 0.029 |
| H1  | 0.3901 | -0.0266 | 0.9451 | 0.043 |
| H3  | 0.3631 | 0.1002  | 0.9525 | 0.043 |

|     |         |         |        |       |
|-----|---------|---------|--------|-------|
| H2  | 0.4873  | 0.0639  | 0.9456 | 0.043 |
| H17 | 0.4318  | -0.0111 | 0.5610 | 0.031 |
| H16 | 0.4446  | 0.1010  | 0.6045 | 0.031 |
| H8  | 0.1993  | 0.0494  | 0.5584 | 0.035 |
| H9  | 0.2710  | 0.1486  | 0.5972 | 0.035 |
| H7  | 0.1391  | 0.1052  | 0.7890 | 0.024 |
| H4  | -0.0414 | 0.1605  | 0.7602 | 0.029 |
| H5  | -0.1104 | 0.1584  | 0.6545 | 0.033 |
| H6  | 0.0154  | 0.1157  | 0.5807 | 0.036 |
| H14 | 0.3361  | -0.1529 | 0.5816 | 0.04  |
| H15 | 0.2094  | -0.1168 | 0.5759 | 0.04  |
| H13 | 0.2725  | -0.1446 | 0.8045 | 0.029 |
| H10 | 0.2057  | -0.3271 | 0.7922 | 0.035 |
| H11 | 0.1727  | -0.4175 | 0.6939 | 0.034 |
| H12 | 0.2131  | -0.3242 | 0.6083 | 0.034 |
| H21 | 0.6314  | -0.0631 | 0.5875 | 0.036 |
| H20 | 0.7686  | -0.1209 | 0.6608 | 0.036 |
| H19 | 0.7325  | -0.1238 | 0.7630 | 0.03  |
| H18 | 0.5591  | -0.0734 | 0.7896 | 0.025 |
| H24 | 0.4315  | 0.4280  | 0.7038 | 0.044 |
| H23 | 0.5507  | 0.3799  | 0.6952 | 0.044 |
| H22 | 0.5168  | 0.4061  | 0.7631 | 0.044 |
| H25 | 0.0645  | 0.2760  | 0.2959 | 0.022 |
| H26 | 0.0156  | 0.0920  | 0.2673 | 0.027 |
| H42 | -0.0148 | 0.0323  | 0.1619 | 0.03  |
| H41 | 0.0019  | 0.1576  | 0.0877 | 0.029 |
| H39 | -0.0066 | 0.4111  | 0.0951 | 0.028 |
| H40 | 0.0853  | 0.3375  | 0.0663 | 0.028 |
| H27 | 0.0677  | 0.5781  | 0.0963 | 0.028 |
| H32 | 0.1828  | 0.5562  | 0.0687 | 0.028 |
| H28 | 0.3223  | 0.8549  | 0.2754 | 0.026 |
| H30 | 0.3454  | 0.8774  | 0.1718 | 0.036 |
| H29 | 0.2679  | 0.7443  | 0.0946 | 0.031 |
| H37 | 0.2582  | 0.3338  | 0.1067 | 0.031 |
| H38 | 0.3124  | 0.4542  | 0.1095 | 0.031 |
| H36 | 0.2968  | 0.4321  | 0.3361 | 0.027 |
| H33 | 0.4696  | 0.3540  | 0.3498 | 0.035 |
| H35 | 0.5583  | 0.3018  | 0.2633 | 0.036 |

|     |         |        |        |       |
|-----|---------|--------|--------|-------|
| H34 | 0.4674  | 0.3224 | 0.1643 | 0.035 |
| H43 | -0.2849 | 0.5379 | 0.1747 | 0.059 |
| H44 | -0.2467 | 0.6639 | 0.1783 | 0.059 |
| H45 | -0.2572 | 0.6058 | 0.2405 | 0.059 |
| H47 | 0.1035  | 0.6262 | 0.4447 | 0.054 |
| H46 | 0.0545  | 0.5057 | 0.4498 | 0.054 |
| H48 | -0.0251 | 0.5968 | 0.4221 | 0.054 |
| H49 | 0.6848  | 0.6312 | 0.4959 | 0.094 |
| H51 | 0.7384  | 0.5135 | 0.4938 | 0.094 |
| H50 | 0.6125  | 0.5267 | 0.4641 | 0.094 |
| H52 | 0.4131  | 0.2892 | 0.9765 | 0.061 |
| H53 | 0.3375  | 0.3933 | 0.9680 | 0.061 |
| H54 | 0.4551  | 0.4053 | 1.0105 | 0.061 |
| H58 | 0.1974  | 0.9098 | 0.0276 | 0.055 |
| H55 | 0.1282  | 1.0189 | 0.0239 | 0.055 |
| H56 | 0.1302  | 0.9503 | 0.0833 | 0.055 |

---

#### Part D. Spectral Data for 1 and 2.

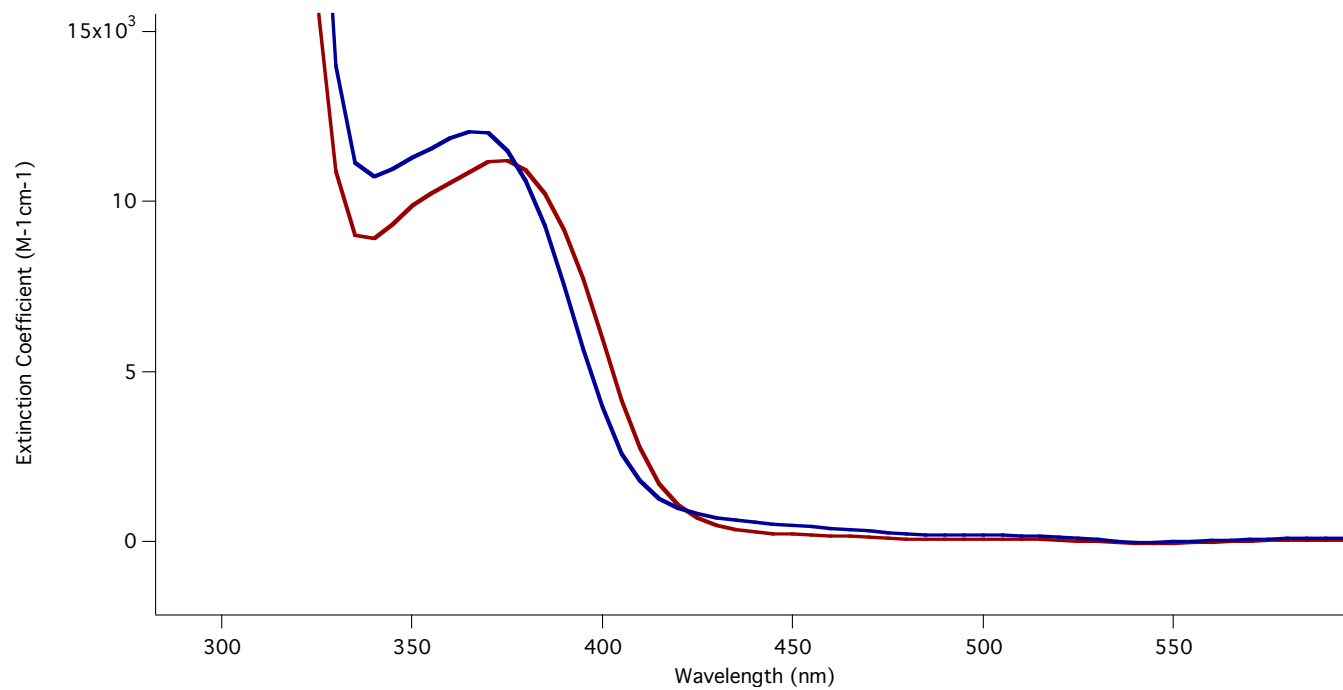

**Figure S1** : Overlap plot of UV -Vis spectra (Extinction coefficient (M<sup>-1</sup>cm<sup>-1</sup> Vs wavelength (nm)) of **1** (red) and **2** (blue) in DMSO.

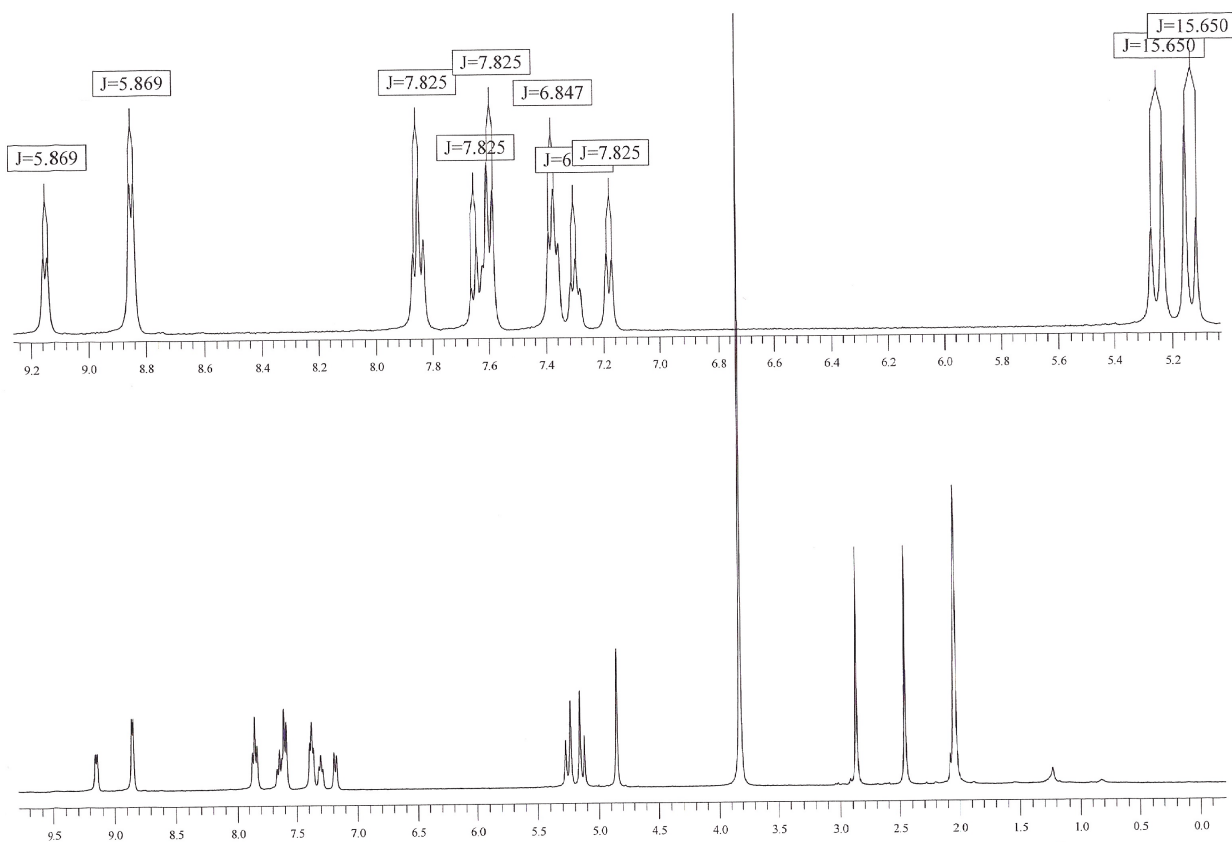

**Figure S2:**  $^1\text{H}$  NMR spectra of **1** in 9:1  $\text{C}_3\text{D}_6\text{O}:\text{D}_2\text{O}$ . The peak at  $\sim 3.8$  ppm corresponds to  $\text{D}_2\text{O}$  in the solvent mixture.



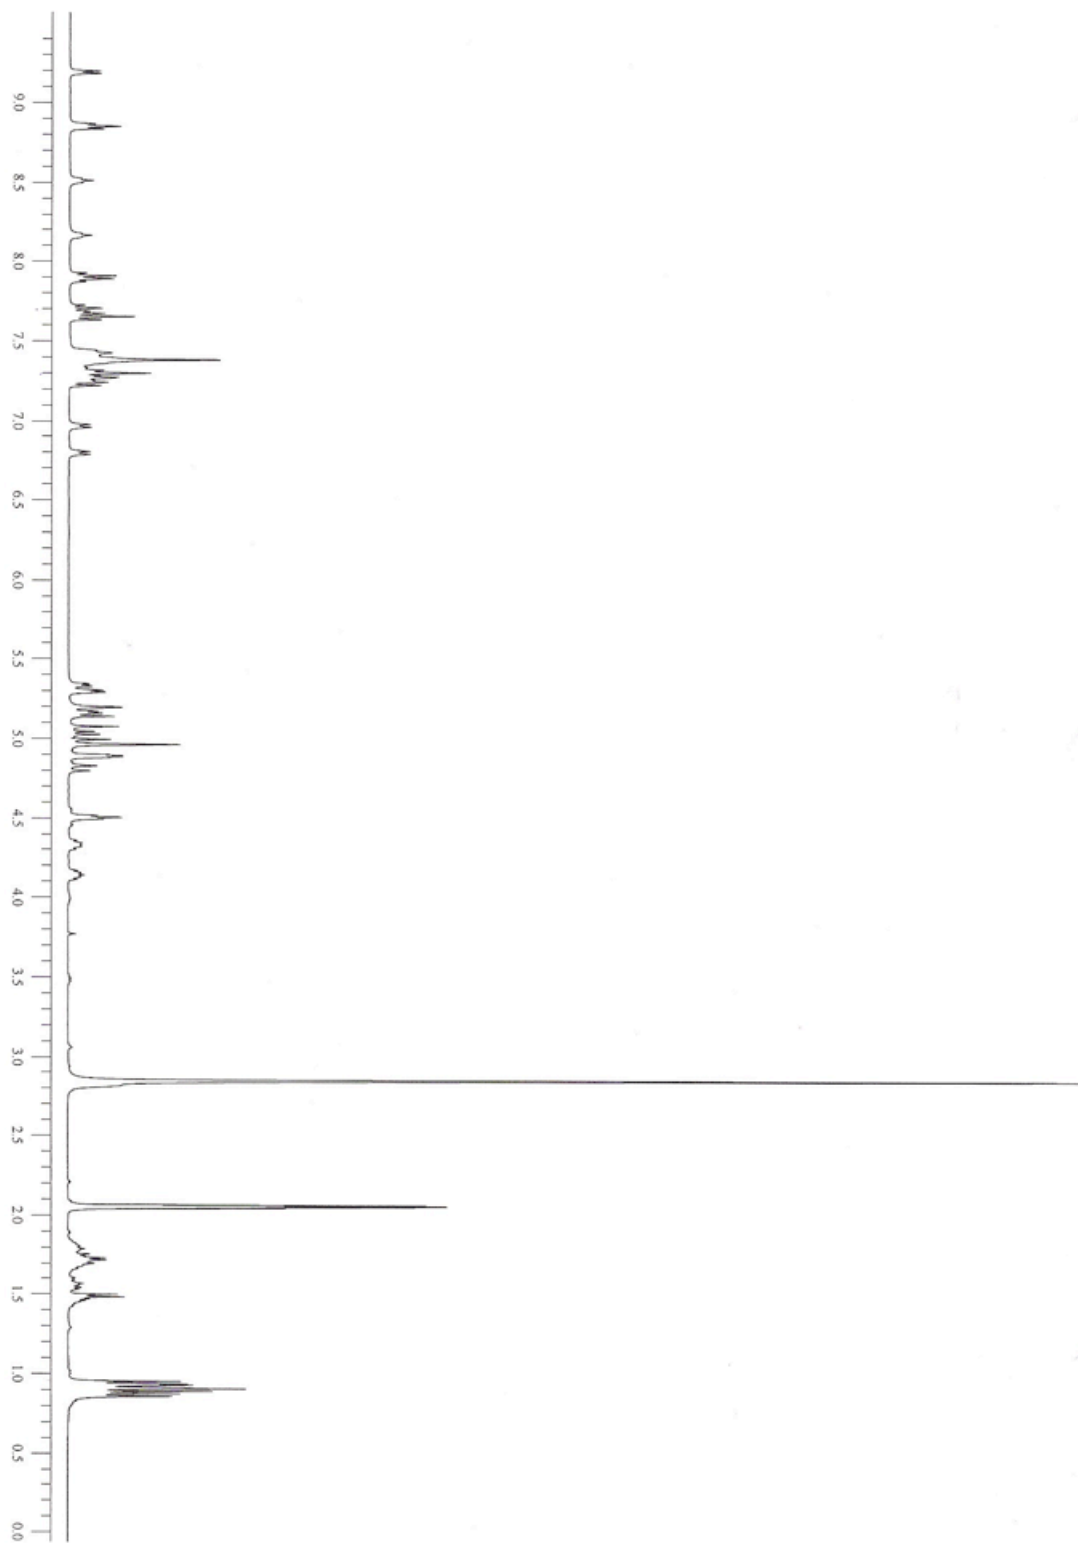

**Figure S3:**  $^1\text{H}$  NMR spectrum of **2** in 100%  $\text{C}_3\text{D}_6\text{O}$ .

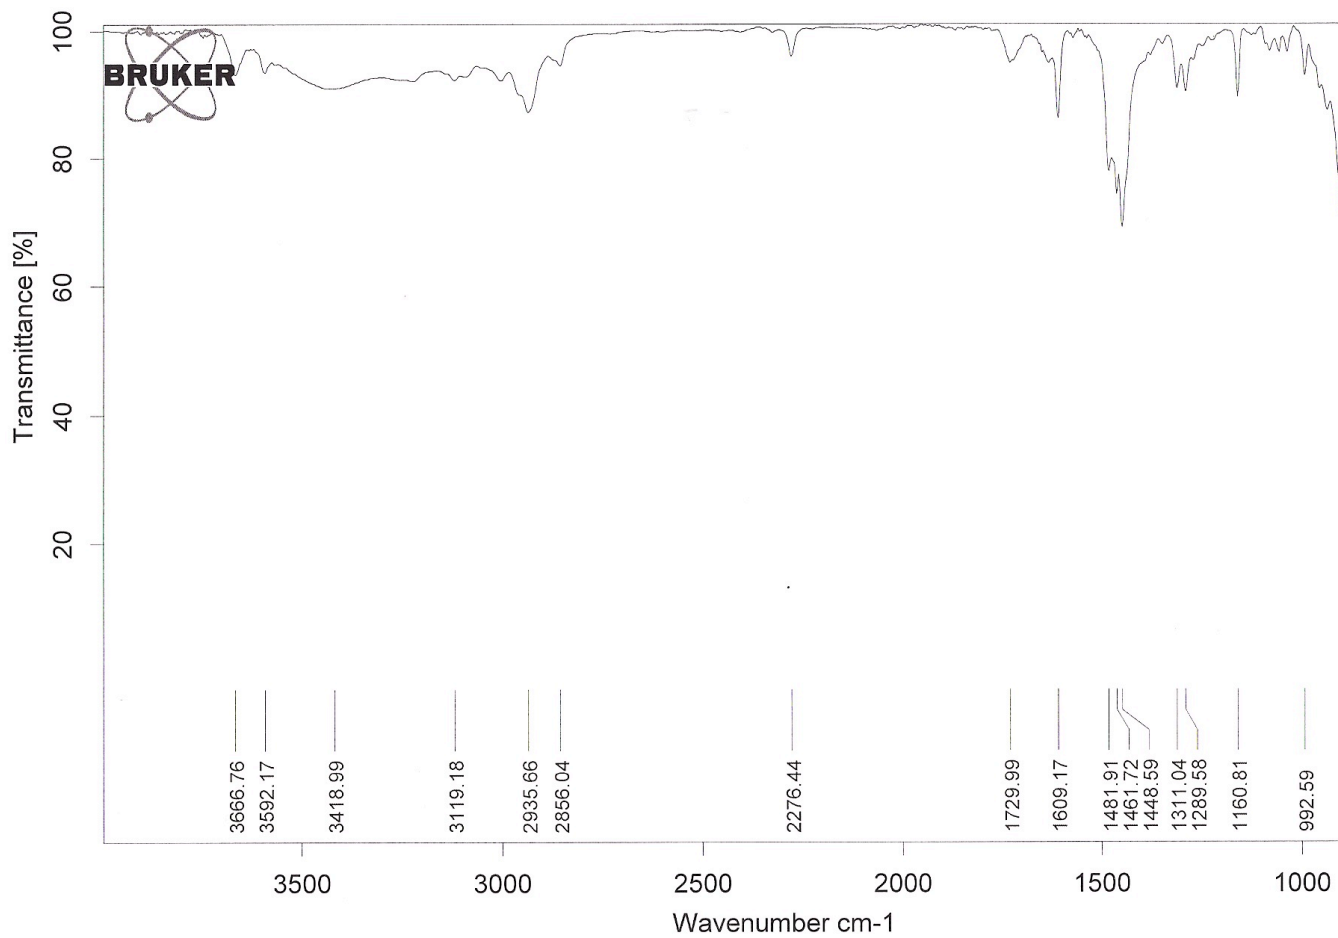

**Figure S4 : IR spectrum of 1 (KBr)**

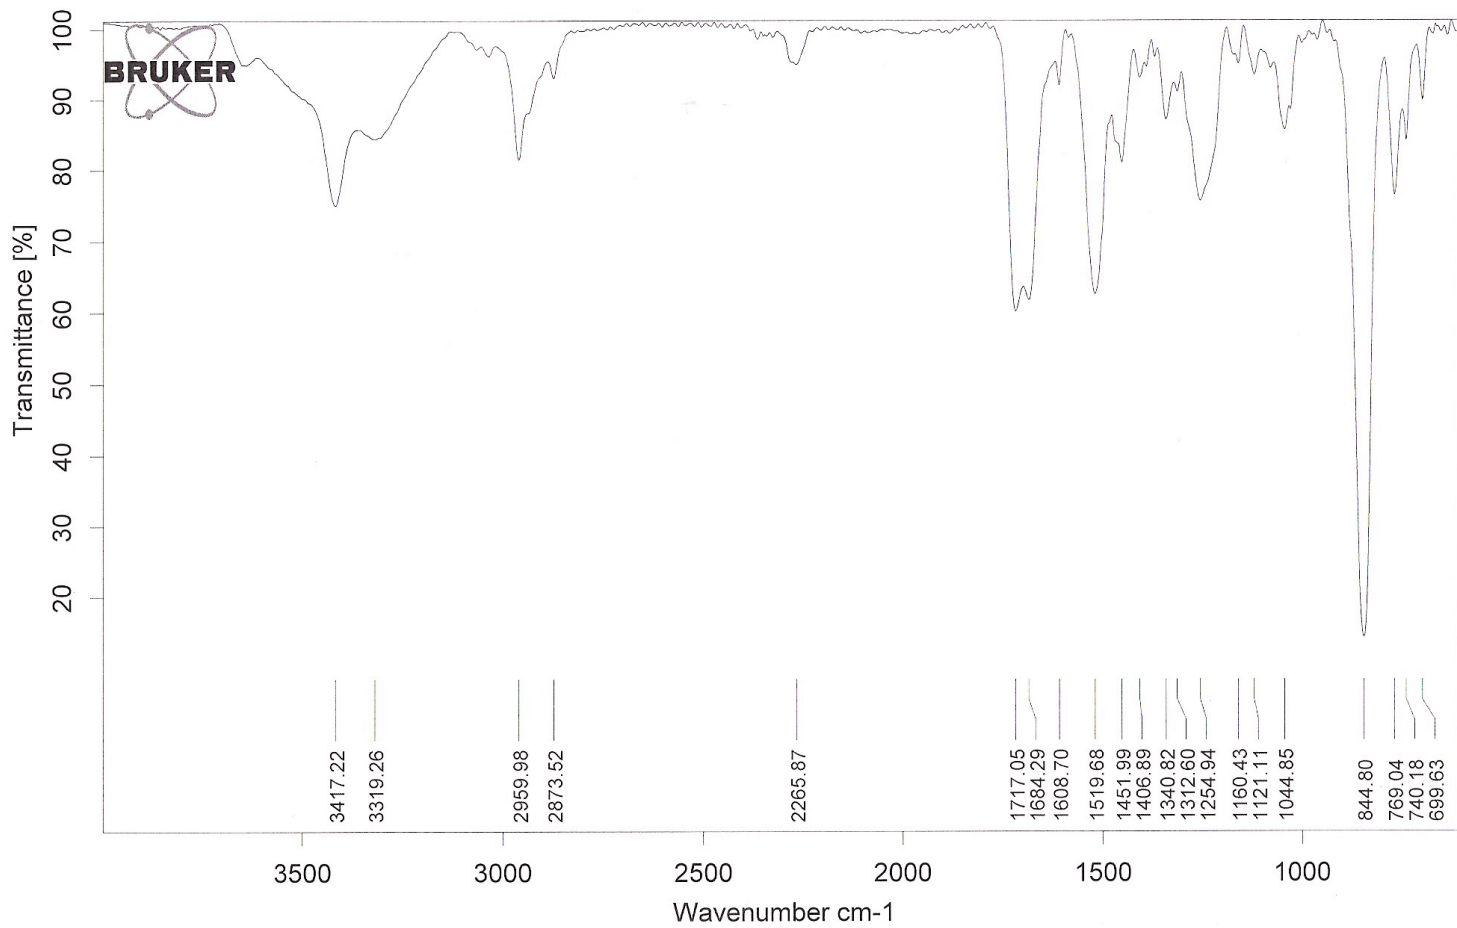

**Figure S5** : IR spectrum of **2** (KBr)

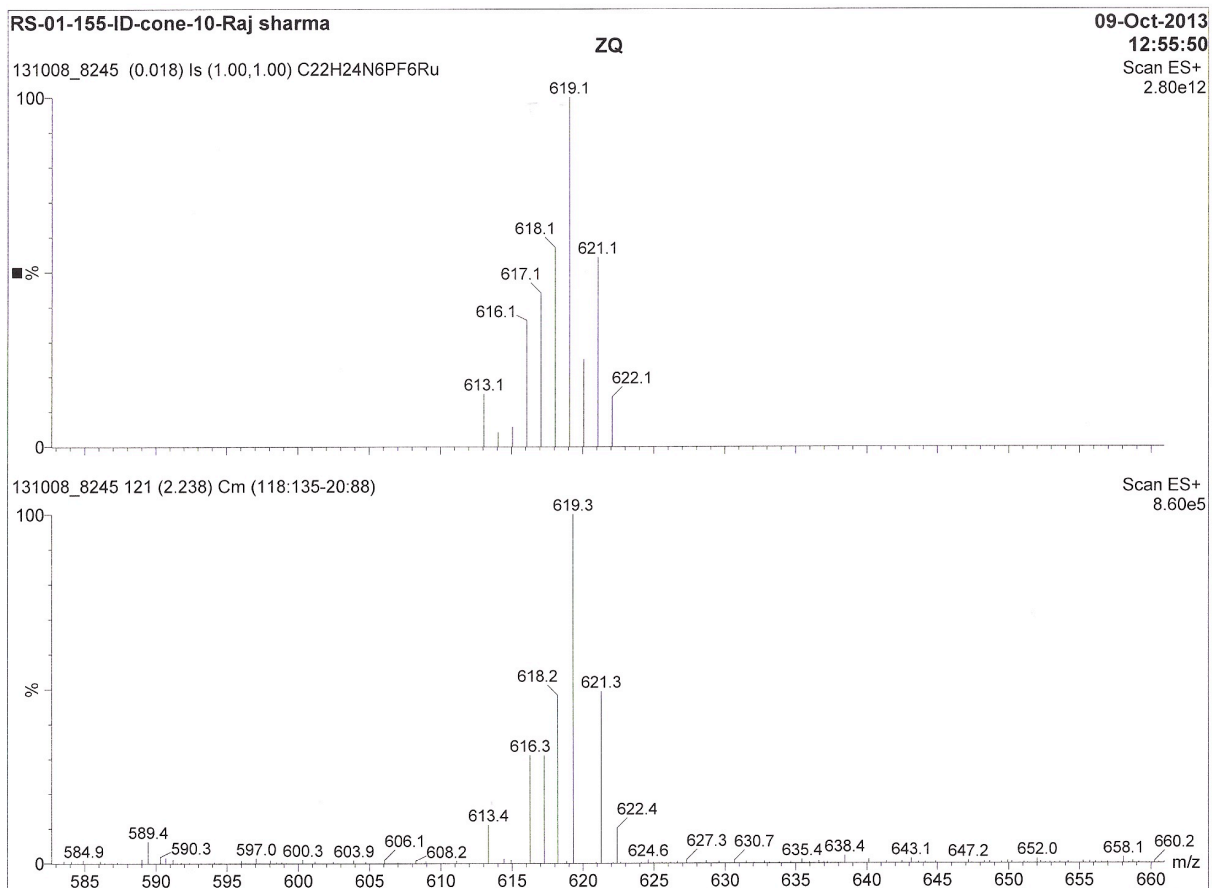

**Figure S6** : Mass spectrum calculated (above) and observed (below) of the cation  $[\text{Ru}(\text{TPA})(\text{CH}_3\text{CN})_2](\text{PF}_6)^+$  of **1**

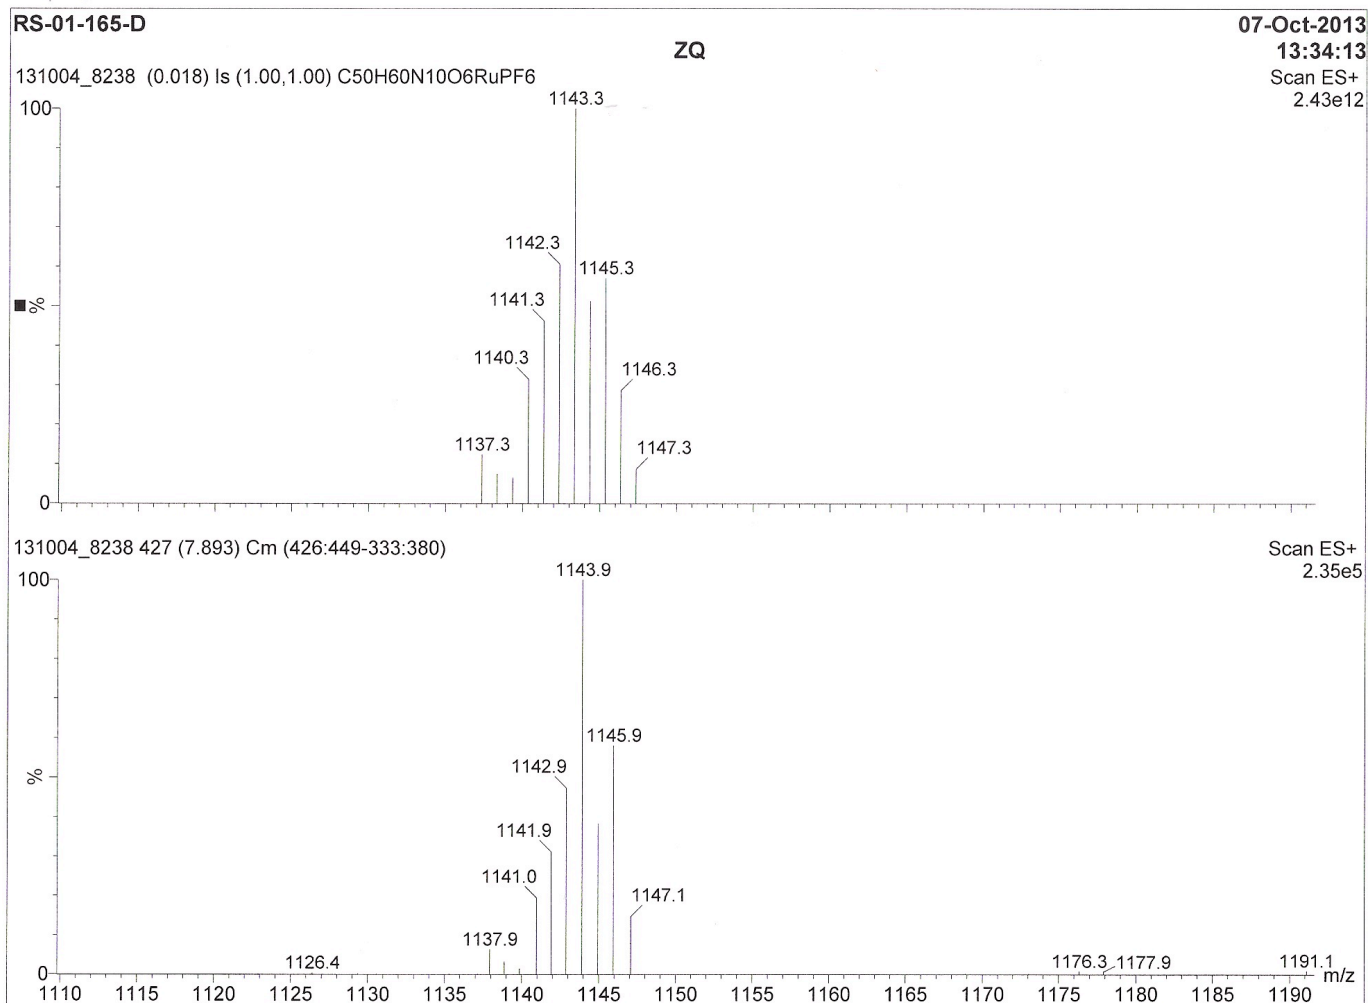

**Figure S7** : Mass spectrum calculated (above) and observed (below) of the cation  $[\text{Ru}(\text{TPA})(\text{RCN})_2](\text{PF}_6)^+$  of **2**

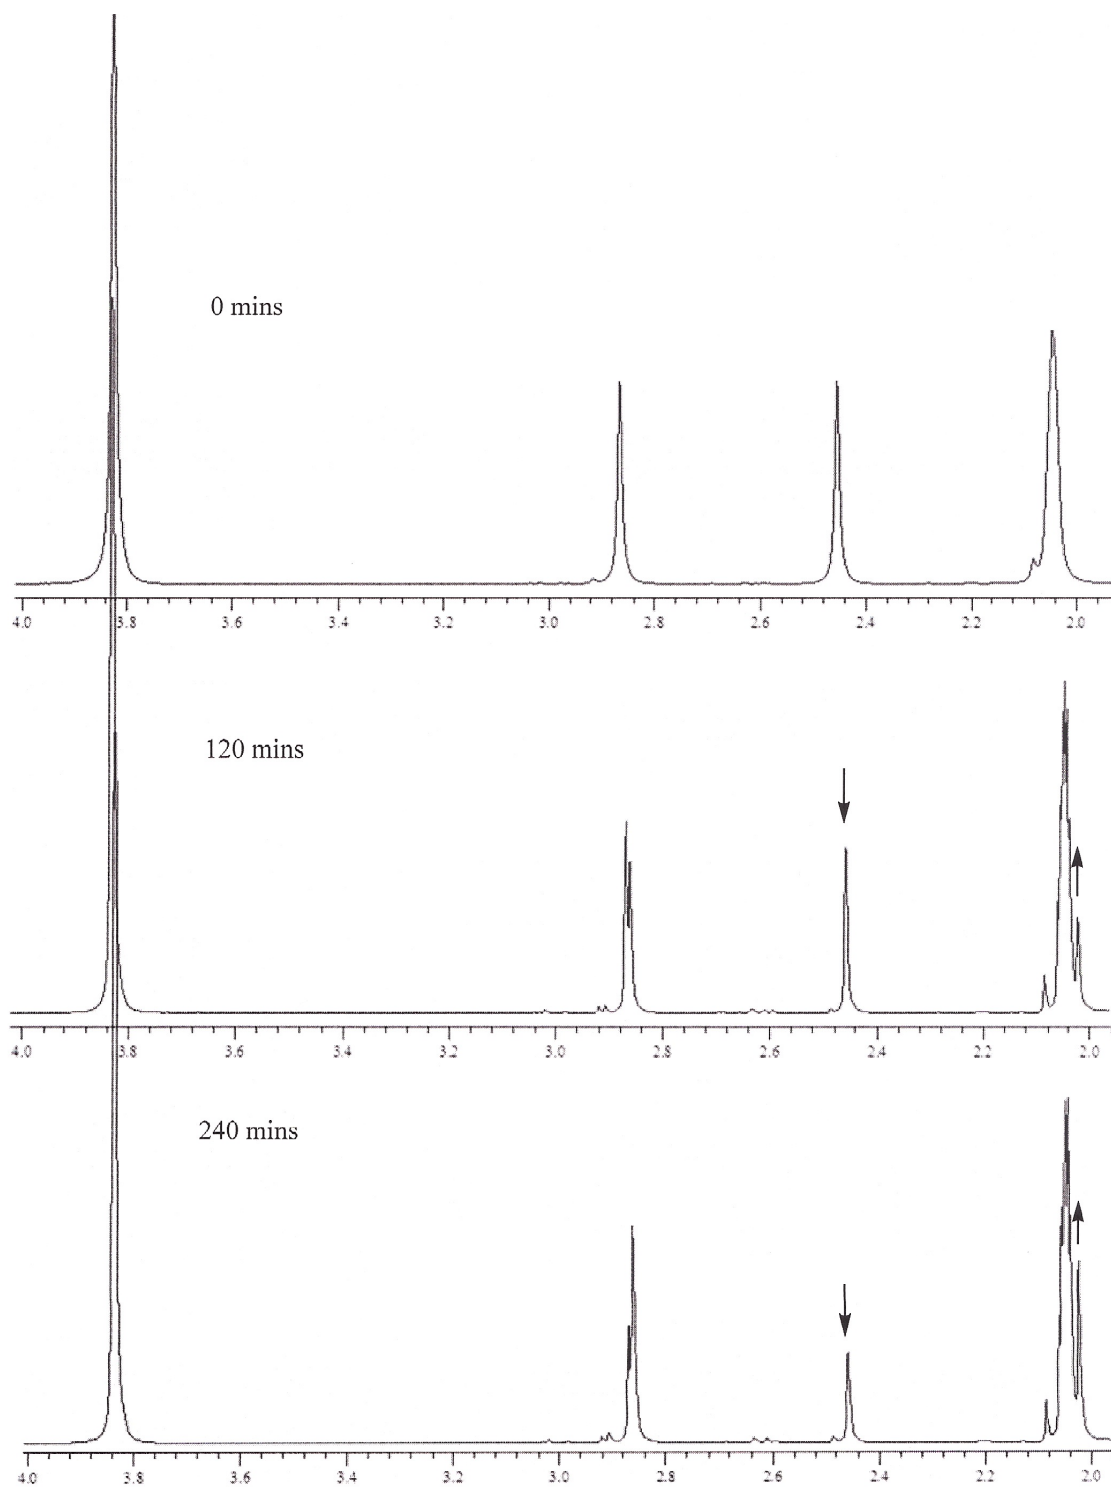

**Figure S8** : Photochemical reaction of **1** in 9:1 C<sub>3</sub>D<sub>6</sub>O:D<sub>2</sub>O. Compound **1** was irradiated with 365 nm light (8W) in an NMR tube. Timescales are longer than reported in Figure 3A because of the higher concentration of this sample.

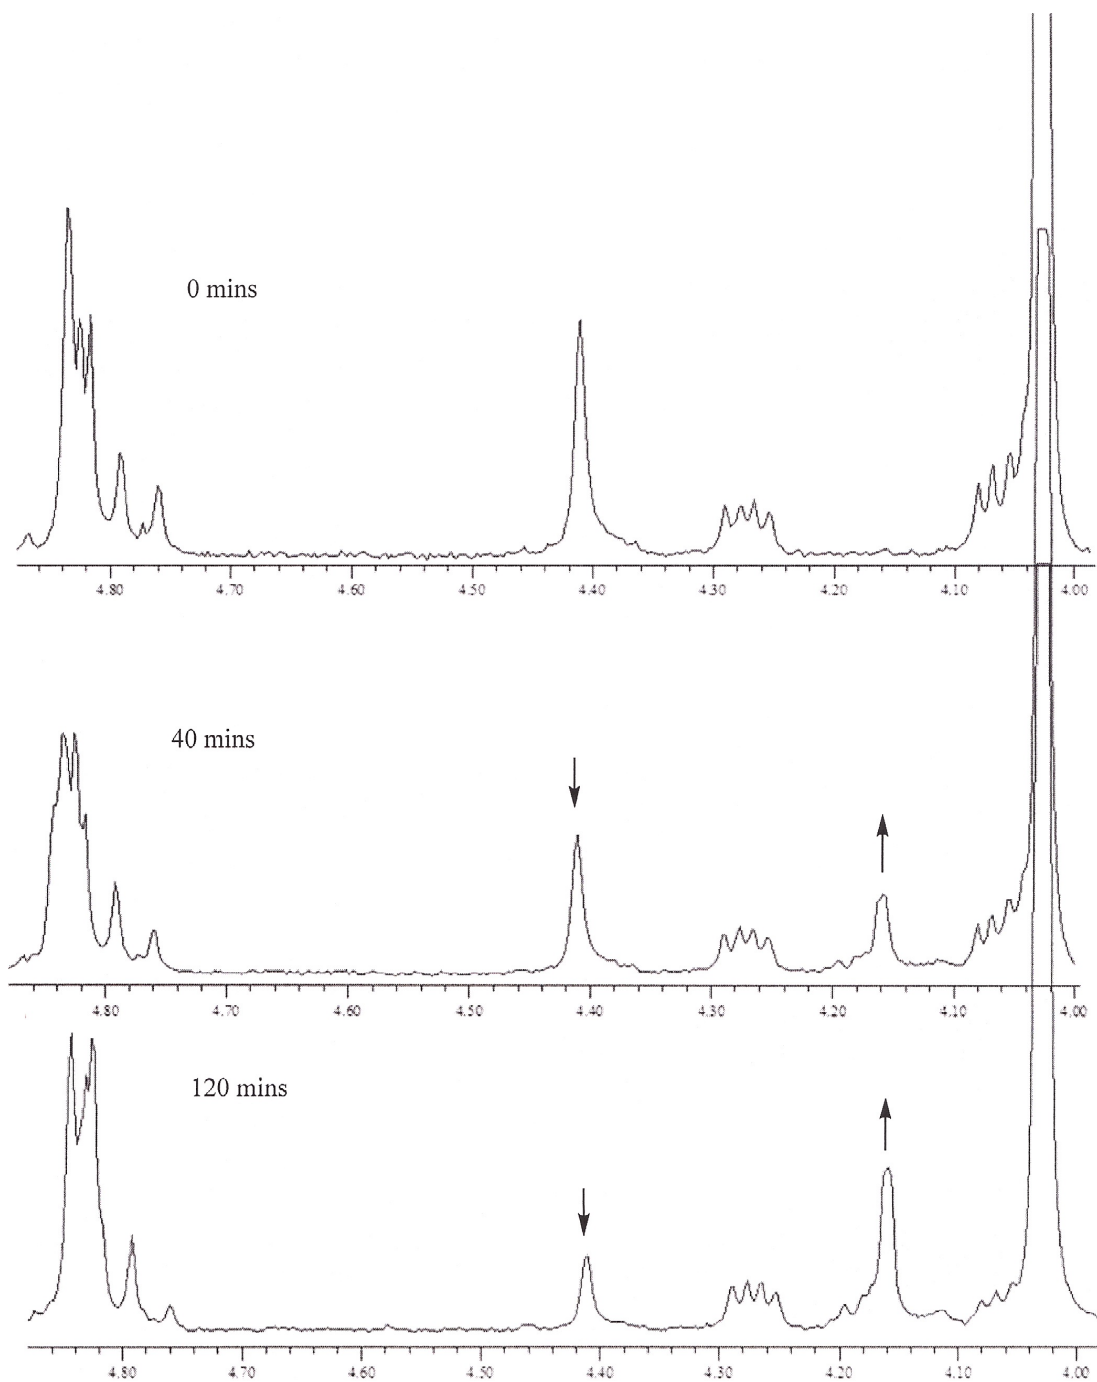

**Figure S9** : Photochemical reaction of **2** in 9:1  $C_3D_6O:D_2O$ . Compound **2** was irradiated with 365 nm light (8W) in an NMR tube. Timescales are longer than reported in Figure 3B because of the higher concentration of this sample.

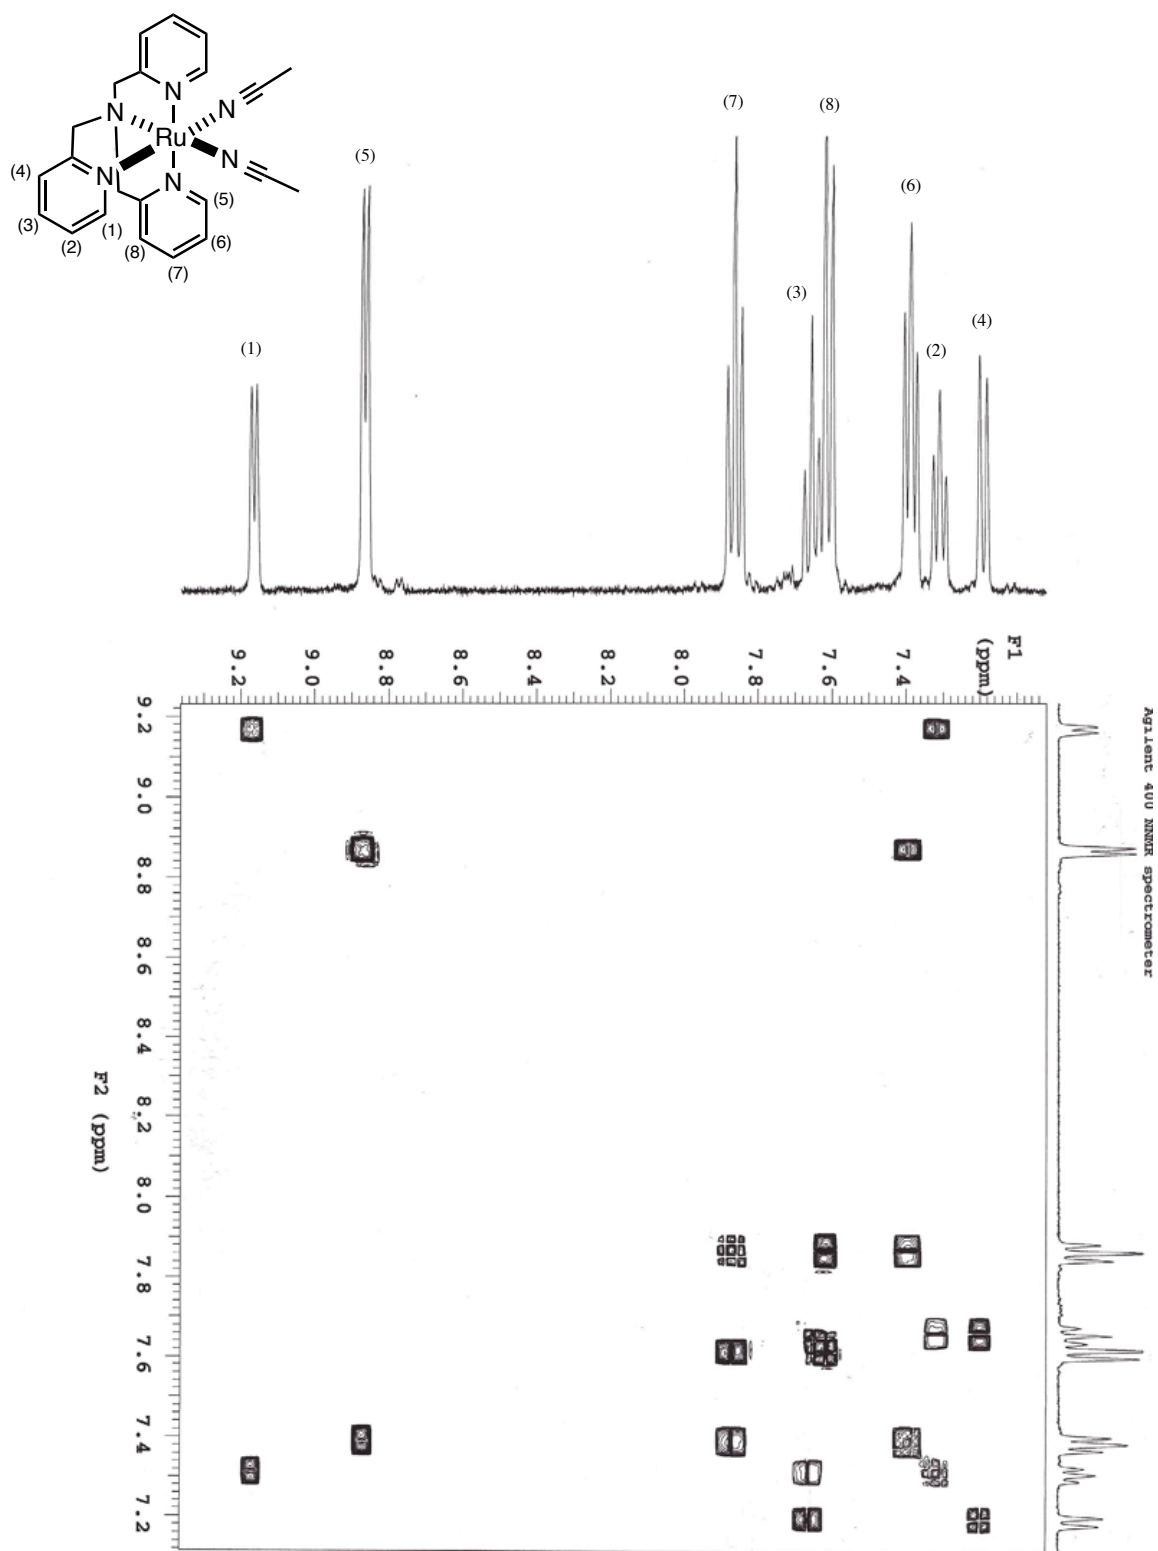

Figure S10 : COSY spectrum of 1



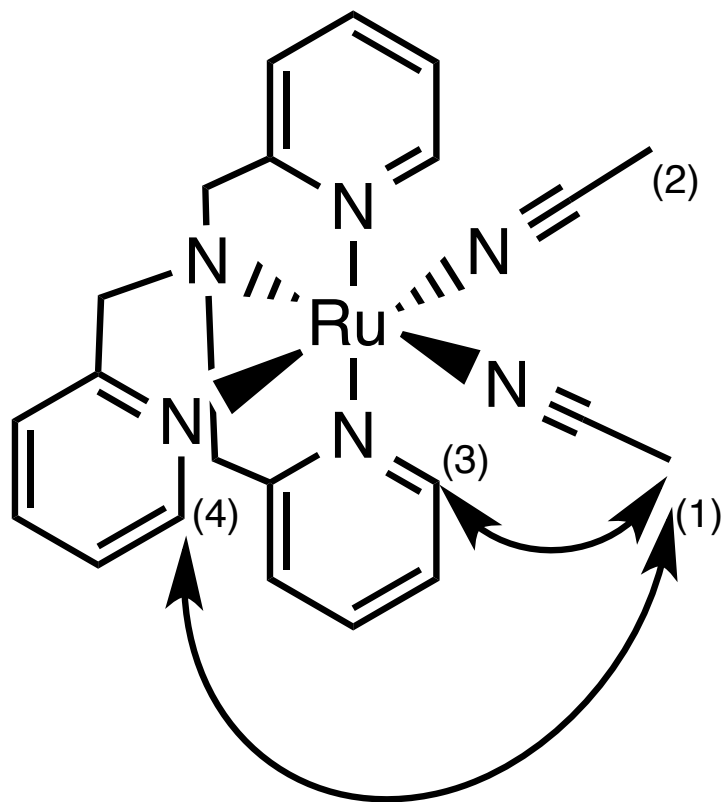

**Figure S11** : NOESY data for **1** with peak assignment. See following two pages for spectra.

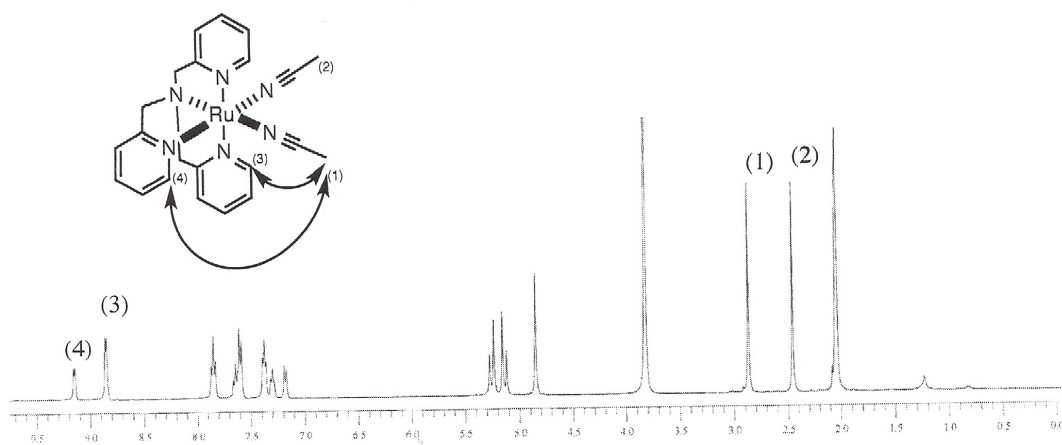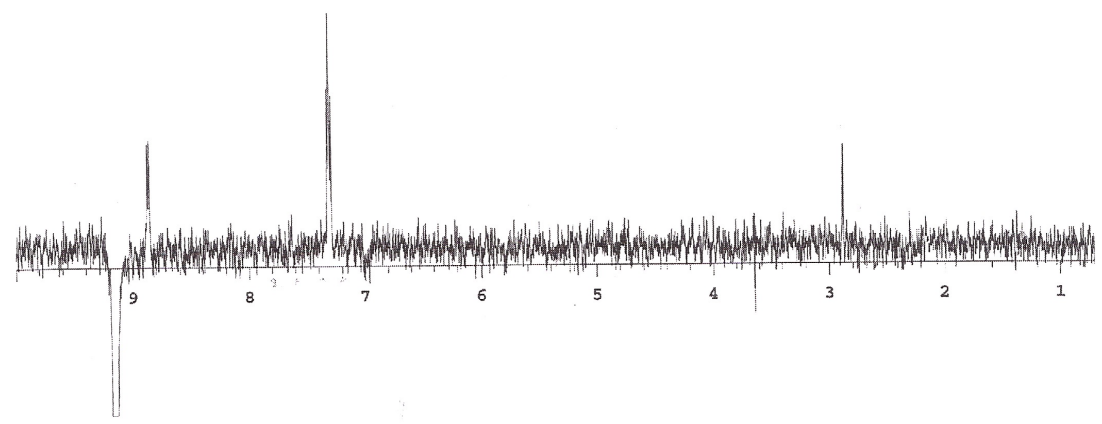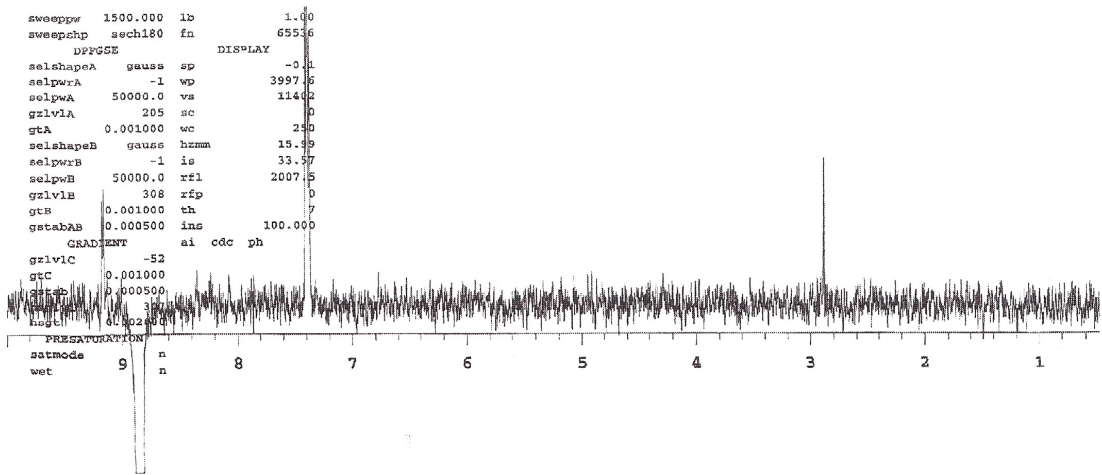

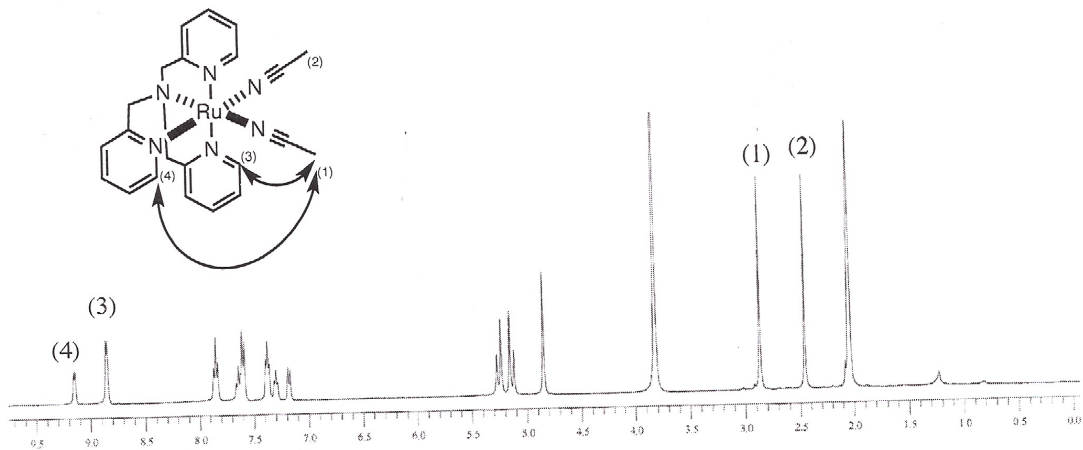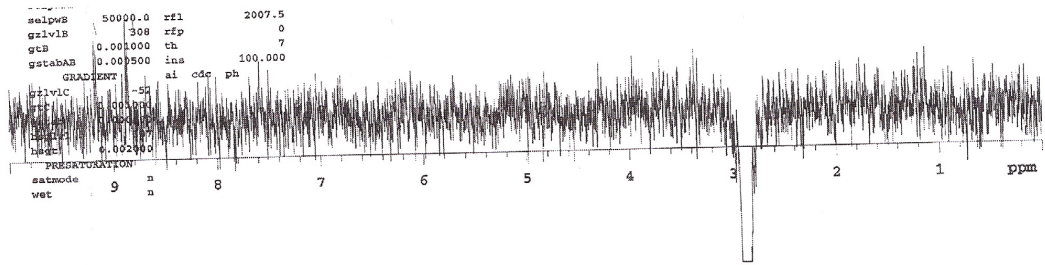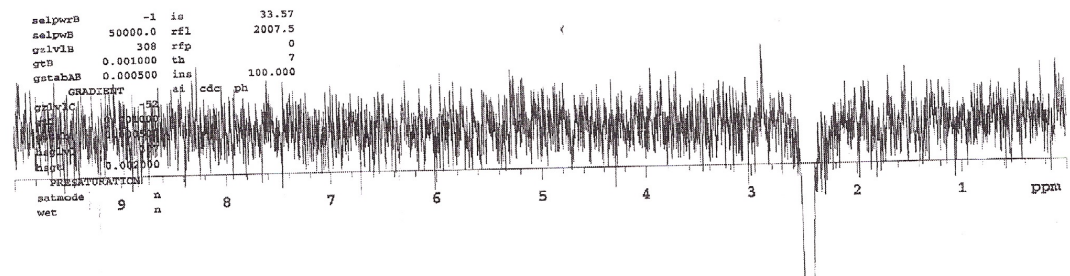

## References:

- (1) Kojima, T.; Amano, T.; Ishii, Y.; Ohba, M.; Okaue, Y.; Matsuda, Y. *Inorg. Chem.* **1998**, *37*, 4076.
- (2) Whiteoak, C. J.; Nobbs, J. D.; Kiryushchenkov, E.; Pagano, S.; White, A. J. P.; Britovsek, G. J. P. *Inorg. Chem.* **2013**, *52*, 7000.
- (3) Radaram, B.; Ivie, J. A.; Singh, W. M.; Grudzien, R. M.; Reibenspies, J. H.; Webster, C. E.; Zhao, X. *Inorg. Chem.* **2011**, *50*, 10564.
- (4) Montalti, M.; Credi, A.; Prodi, L.; Gandolfi, M. T. *Handbook of Photochemistry*; 3rd ed.; CRC Press: Boca Raton, FL, 2006.
